# Supplementary material for: Reduced long-term care cost by social participation among older Japanese adults: a prospective follow-up study in JAGES
Source: PubMed Central journal article supplement — BMJ Open. 2019 Mar 30;9(3):e024439. doi: 10.1136/bmjopen-2018-024439 (PMC6475166; doi:10.1136/bmjopen-2018-024439), 2019-03-30
Supplement: bmjopen-2018-024439.draft_revisions.pdf [file bmjopen-2018-024439.draft_revisions.pdf]

# BMJ Open

BMJ Open is committed to open peer review. As part of this commitment we make the peer review history of every article we publish publicly available.

When an article is published we post the peer reviewers' comments and the authors' responses online. We also post the versions of the paper that were used during peer review. These are the versions that the peer review comments apply to.

The versions of the paper that follow are the versions that were submitted during the peer review process. They are not the versions of record or the final published versions. They should not be cited or distributed as the published version of this manuscript.

BMJ Open is an open access journal and the full, final, typeset and author-corrected version of record of the manuscript is available on our site with no access controls, subscription charges or pay-per-view fees (<http://bmjopen.bmj.com>).

If you have any questions on BMJ Open's open peer review process please email [info.bmjopen@bmj.com](mailto:info.bmjopen@bmj.com)

# BMJ Open

## Reduced long-term care cost by social participation among older Japanese adult: A eleven-year follow-up study in JAGES

|                               |                                                                                                                                                                                                                                                                                                                                                                                                                                                                                                                                                                                                                                                                                                                                                                                                                                                                                                          |
|-------------------------------|----------------------------------------------------------------------------------------------------------------------------------------------------------------------------------------------------------------------------------------------------------------------------------------------------------------------------------------------------------------------------------------------------------------------------------------------------------------------------------------------------------------------------------------------------------------------------------------------------------------------------------------------------------------------------------------------------------------------------------------------------------------------------------------------------------------------------------------------------------------------------------------------------------|
| Journal:                      | <i>BMJ Open</i>                                                                                                                                                                                                                                                                                                                                                                                                                                                                                                                                                                                                                                                                                                                                                                                                                                                                                          |
| Manuscript ID                 | bmjopen-2018-024439                                                                                                                                                                                                                                                                                                                                                                                                                                                                                                                                                                                                                                                                                                                                                                                                                                                                                      |
| Article Type:                 | Research                                                                                                                                                                                                                                                                                                                                                                                                                                                                                                                                                                                                                                                                                                                                                                                                                                                                                                 |
| Date Submitted by the Author: | 25-May-2018                                                                                                                                                                                                                                                                                                                                                                                                                                                                                                                                                                                                                                                                                                                                                                                                                                                                                              |
| Complete List of Authors:     | Saito, Masashige; Nihon Fukushi University, Faculty of Social Welfare; Nihon Fukushi University, Center for Well-being and Society<br>Aida, Jun; Tohoku University Graduate School of Dentistry, International and Community Oral Health<br>kondo, naoki; University of Tokyo School of Public Health, Department of Health Economics and Epidemiology Research<br>Saito, Junko; University of Tokyo School of Public Health, Department of Health Economics and Epidemiology Research<br>Kato, Hiroataka; Keio University Graduate School of Business Administration<br>Ota, Yasuhiro; QOL 84 Plus Inc.<br>Amemiya, Airi; University of Tokyo School of Public Health, Department of Health Economics and Epidemiology Research<br>Kondo, Katsunori; Chiba University, Center for Preventive Medical Science; National Center for Geriatrics and Gerontology, Center for Gerontology and Social Science |
| Keywords:                     | Long-term care, cumulative cost, social participation, older adults, cost containment                                                                                                                                                                                                                                                                                                                                                                                                                                                                                                                                                                                                                                                                                                                                                                                                                    |
|                               |                                                                                                                                                                                                                                                                                                                                                                                                                                                                                                                                                                                                                                                                                                                                                                                                                                                                                                          |

SCHOLARONE™  
Manuscripts

**Title:** Reduced long-term care cost by social participation among older Japanese adult: A eleven-year follow-up study in JAGES

**Author names and affiliations:**

Masashige Saito<sup>1,2</sup>, Jun Aida<sup>3</sup>, Naoki Kondo<sup>4</sup>, Junko Saito<sup>4</sup>, Hiroataka Kato<sup>5</sup>, Yasuhiro Ota<sup>6</sup>, Airi Amemiya<sup>4</sup>, Katsunori Kondo<sup>2,7,8</sup>

<sup>1</sup> Faculty of Social Welfare, Nihon Fukushi University, Aichi, Japan.

<sup>2</sup> Center for Well-being and Society, Nihon Fukushi University, Aichi, Japan.

<sup>3</sup> Department of International and Community Oral Health, Tohoku University Graduate School of Dentistry, Miyagi, Japan

<sup>4</sup> Department of Health and Social Behavior, Department of Health Education and Health Sociology, School of Public Health, The University of Tokyo, Tokyo, Japan

<sup>5</sup> Graduate School of Business Administration, Keio University, Kanagawa, Japan

<sup>6</sup> QOL 84 Plus Inc., Aichi, Japan

<sup>7</sup> Center for Preventive Medical Sciences, Chiba University, Chiba, Japan

<sup>8</sup> Center for Gerontology and Social Science, National Center for Geriatrics and Gerontology, Aichi, Japan

**Corresponding author:** Masashige Saito

Faculty of Social Welfare, Nihon Fukushi University, Aichi, Japan

Okuda, Mihama-cho, Chita-gun, Aichi 470-3295, Japan

E-mail: masa-s@n-fukushi.ac.jp

**Keywords:** Long-term care, cumulative cost, social participation, older adults, cost containment

**Word counts:** 2,352 words

**Short Title:** Long-term care costs and social participation

**Number of Tables, Figures, and Supplementary Materials:**

3 tables; 1 figure; 3 supplementary materials

## Abstract

**Objectives:** Reducing costs related to functional disabilities and long-term care (LTC) is necessary in aging societies. We evaluated the differences in the cumulative cost of public long-term care insurance (LTCI) services by social participation.

**Design:** Prospective observational study.

**Setting:** Our baseline survey was conducted in March 2006 among people aged 65 or older who were not eligible for public LTCI benefits were selected using a complete survey in Tokoname City, Japan. We followed up with their LTC services costs over a period of 11 years. Social participation was assessed by the frequency of participation in clubs for hobbies, sports, or volunteering. We adopted a classical linear regression analysis and an inverse probability weighting (IPW), with multiple imputation of missing values

**Participants:** 5,377 older adults.

**Primary outcome measures:** The cumulative cost of public LTCI services for 11 years.

**Results:** Even when adjusting for the confounding variables, social participation at the baseline was negatively associated with the cumulative cost of LTCI services. The IPW model showed that for respondents who participated in clubs for hobbies or sports once a week or more, the cost of LTCI services was lower: approximately 3,500 USD and 6,000 USD for 11 years per person, in comparison to non-participants.

**Conclusions:** Older adults' participation in community organizations may help reduce future LTC costs. Promoting participation opportunities in the community could ensure the financial stability of LTCI services.

## Strengths and limitations of this study

- To our knowledge, this is the first to demonstrate that social participations among older adults might help lower subsequent LTCI costs.
- Our findings are based on eleven-years prospective observational study using public LTCI receipt data in Japan.
- Selection bias might have occurred because of the 53% response rate to the base-line survey.
- The measurements of social participation rely on self-reported questionnaire.

## 1 **Main text**

### 2 **Introduction**

3 Across the globe, costs related to functional disabilities and long-term care (LTC) are  
4 rapidly increasing in societies with aging populations. Expenses are greater among  
5 those with more severe impairments.<sup>1</sup> In Japan, one of the countries experiencing the  
6 highest rate of aging, the proportion of older people is currently 27.3% and is predicted  
7 to reach around 40% by 2065.<sup>2</sup> Under these circumstances, the costs for long-term care  
8 insurance (LTCI) are expected to rise from 10 billion USD in 2016 to 21 billion USD  
9 by 2025.

10 Lowering these costs requires building a sustainable, healthy aging society. The Japa-  
11 nese government implemented a public nursing care insurance law that includes an  
12 LTC prevention policy.<sup>3</sup> For this policy, a population approach as primary prevention  
13 was proposed rather than a high-risk one which was grounded in risk screening based  
14 on intervention targeting. Promoting social participation is considered an effective in-  
15 tervention regarding the population approach, which focuses on the entire group of  
16 older adults in a community.

17 Although social participation is an ambiguous concept, it can be categorized into three  
18 types: collective, productive, and political.<sup>4</sup> We view this idea as collective social ac-  
19 tivities in the local community. Social participation helps maintain social networks,  
20 support, and roles, raises self-esteem and self-efficacy, and facilitates access to various  
21 kinds of information. Several systematic reviews and meta-analyses have reported on  
22 the physical, psychological, and social benefits of social participation among older  
23 people.<sup>5-10</sup> Previous observational studies in Japan found that collective social partici-  
24 pation activities such as volunteering, sports clubs, and hobbies among older adults  
25 lowered the risk of developing depressive symptoms,<sup>11-13</sup> the incidence of functional  
26 disabilities,<sup>14-16</sup> cognitive decline or dementia,<sup>17,18</sup> falls,<sup>19</sup> and immature death.<sup>20-23</sup>

27 If social participation extends healthy life expectancy and reduces the time spent in in-  
28 tensive nursing care, then the cumulative cost of LTCI services should be lower among  
29 the participants; however, to our knowledge, there is no evidence that social participa-  
30 tion lessens it. In addition to health promotion, the cost of LTCI services is one of the

1  
2  
3  
4  
5 1 most important issues for the public sector as an insurer. The evidence for contributing  
6 2 to cost-saving has been useful for recent intervention financing schemes that provide  
7 3 economic incentives to service providers; for instance, social impact bonds (SIBs). In  
8 4 this paper, using data from a follow-up study that took place over a period of 11 years  
9 5 and tracked older Japanese adults, we assessed the cost containment effect of LTCI  
10 6 services via social participation.  
11  
12  
13  
14  
15  
16  
17  
18  
19  
20  
21  
22  
23  
24  
25  
26  
27  
28  
29  
30  
31  
32  
33  
34  
35  
36  
37  
38  
39  
40  
41  
42  
43  
44  
45  
46  
47  
48  
49  
50  
51  
52  
53  
54  
55  
56  
57  
58  
59  
60

## 1 **Methods**

### 2 ***Study design***

3 The Japan Gerontological Evaluation Study (JAGES) conducted a self-administered  
4 questionnaire in March 2006 as a baseline; 5,483 respondents who were 65 years or  
5 older, physically and cognitively independent, and not eligible for public LTCI bene-  
6 fits were selected using a complete survey; they live in the city of Tokoname in Aichi  
7 Prefecture (response rate=53.4%). Afterward, we obtained receipt data on LTCI bene-  
8 fits over a period of 11 years after the baseline survey. After eliminating respondents  
9 who lacked information on sex and age (n=42), who had moved out of their residence  
10 (n=38), and who had been certified for LTCI before the baseline survey (n=26), 5,377  
11 respondents were linked to the LTCI receipt dataset (**Figure 1**). Out of this amount,  
12 30.4% had used LTCI services at least once, and 28.4% passed away during the fol-  
13 low-up period. This study was performed based on a collaborative research agreement  
14 with the local municipality. The ethics board at Nihon Fukushi University gave ethical  
15 permission (No. 16-29).

### 16 ***Measurements***

#### 17 **Outcome variables; the costs of LTCI services**

18 We obtained the LTC costs of insured services across forty-four points every three  
19 months (April, July, October, January) over a period of 11 years. We summed them up  
20 after tripling these monthly costs in order to calculate an approximate value of the  
21 overall cost for the follow-up period. We used the currency exchange rate of 100JPY  
22 to 1USD.

23 In addition, Japanese LTCI operates based on social insurance principles. Only ser-  
24 vices are provided, not cash allowances, and recipients can choose their services and  
25 providers.<sup>24</sup> The receipt data includes information about using insured services such as  
26 home visits, day, short-stay, residential, or in-facility services. The data do not include  
27 costs, which are not covered by insurance (such as food, housing, and diaper expenses).  
28 In general, 10% of these costs are co-payments (the municipality, which acts as an in-  
29 surer, pays 90%), although there is an upper limit to the amount of monthly insurance  
30



benefits, which differs depending on the needed level of care. People with certifications for LTC and who need (levels 1 to 5) or require support (levels 1 or 2) can use LTCI services. Those higher levels of care can utilize more LTCI services through insurance coverage. The cumulative cost of such care in the following cases is zero: deceased individuals who did not have functional disabilities, respondents who did not have proper certification, and non-service users.

### **Explanatory variables: Social participation**

We focused on the frequency of participation in three major kinds of social groups among older Japanese adults: hobbies, sports, and volunteering. Please note that participating in volunteer activities is not necessarily “voluntary” in Japan. We categorized it to the four frequencies; *never*; *a few times a year*; *once or twice a month*; and *once a week or more*.

### **Covariates**

For potential confounding variables we chose sex, age, the presence of disease or impairment, educational attainment, equivalent income (USD), marital status, living situation, and self-rated health for the baseline survey. We used age as a continuous variable ( $73.4 \pm 6.2$ ). We dichotomized the presence of disease or impairment, and we categorized years of education as *<6*, *6-9*, *10-12*, and *13+*. We equalized household income by the square root of the numbers and classified it as *<20.0*, *20.0-39.9*, and *40.0+* thousand USD. Marital status consisted of *married*, *widowed*, *divorced*, and *never married*. We classified living situation as *living alone*, *with one's spouse only*, *with a child*, or *with others* such as grandchildren, siblings, and relatives. We assessed self-rated health using four categories: *excellent*, *good*, *fair*, and *poor*.

### **Statistical analysis**

After calculating the descriptive statistics, we conducted four regression analyses. First, we adopted a classical linear regression (ordinary linear squares [OLS]) model, controlling the above potential confounding variables. We handled the missing value in each control variable as a dummy variable. Second, we predicted the marginal effects, adopting a generalized linear model (GLM)<sup>25</sup> with Gamma distribution, as well as the

1  
2  
3  
4  
5 1 log link and robust variance estimator, because our dependent variable is not normally  
6 2 distributed. Next, we performed a multiple imputation technique by chained equations  
7 3 under the missing at random assumption. We created twenty imputed datasets. Using  
8 4 each dataset, we first estimated the OLS model with the robust variance estimator. Fi-  
9 5 nally, to estimate the causal treatment effect from observational data, we adopted the  
10 6 inverse probability weighting (IPW) model<sup>26,27</sup> using the imputed data sets. We calcu-  
11 7 lated the generalized propensity scores using multinomial regression analysis,  
12 8 employing all previously listed potential confounders. For reference, we only exam-  
13 9 ined the same model among the deceased, who passed away during the follow-up  
14 10 period. The LTCI costs for the deceased indicates the “lifetime cost” of LTCI because  
15 11 they did not use LTCI services at the baseline. We performed analyses using STATA  
16 12 15.1 (STATA Corp LP, College Station, Texas, USA).

17  
18  
19  
20  
21  
22  
23  
24  
25  
26  
27  
28  
29  
30  
31  
32  
33  
34  
35  
36  
37  
38  
39  
40  
41  
42  
43  
44  
45  
46  
47  
48  
49  
50  
51  
52  
53  
54  
55  
56  
57  
58  
59  
60

## Results

**Table 1** shows the characteristics of the respondents; the mean age at the baseline was 73.4; 52.0% of the respondents were male. The average of the cumulative cost of LTCI services during the follow-up period was 13.7 thousand USD. There were significant differences in the average duration for the level of care required for social participation during the follow-up period (**Table 2**). Non-participants in groups for hobbies, sports, and volunteering had a longer duration of certification for LTC at all levels, level two and above, and level four and above. For example, among participants who took part in the group for hobbies, the average duration for non-participants was 14.1 (standard deviation [SD]=25.8) months, whereas that of those who participated “once a week or more” was 10.6 (SD=21.6) months.

The classical regression model showed that in comparison to non-participants, respondents who participated in the group for hobbies once a week produced a cost containment in 3.6 (95% confidence interval [CI]: 6.0 to 1.3) thousand USD, which was lower per person for LTCI cumulative costs over the 11-year period (**Table 3**). Likewise, participating in a sports club was also significantly associated with lower LTCI costs: the category of those who took part “once a week or more” was 4.9 [95% CI: 6.9 to 2.8] thousand USD less per person. However, in the volunteer group, only less frequent participation was associated with lower costs; for individuals in the category of “a few times a year” this figure was 4.1 [95% CI: 7.1 to 1.0] thousand USD less per person. When we changed the estimation method to GLM, and when we adopted OLS after multiple imputation, the major results and trends were similar to the above, although some point estimations in GLM were higher in the categories that had a small sample size (please see **Supplementary File 1**).

The average treatment effects of IPW showed similar outcomes. In comparison to non-participants, going to a group for hobbies once a week or more resulted in a cost that was reduced by approximately 3.5 [95% CI: 6.2 to 0.8] thousand USD; for sports clubs, this lowered figure was approximately 6.1 [95% CI: 9.3 to 2.8] thousand USD. The significant relationship with less frequent participation in the volunteer group dis-

1  
2  
3  
4  
5 1 appeared, but the direction of the association and point estimations did not largely  
6 2 change (the C statistics in these models are shown in **Supplementary File 2**).

7  
8 3 In addition, in comparison to non-participants, for deceased individuals during the fol-  
9 4 low-up period, joining a group for hobbies (once a week+) or sports (once a week+)  
10 5 led to a reduced cost of approximately 3.9 to 5.7 thousand USD, and 9.4 to 11.4 thou-  
11 6 sand USD, respectively (please see **Supplementary File 3**). These outcomes are  
12 7 preliminary because there were very few analyzed subjects (especially the sports and  
13 8 volunteer groups).  
14  
15  
16  
17  
18  
19  
20  
21  
22  
23  
24  
25  
26  
27  
28  
29  
30  
31  
32  
33  
34  
35  
36  
37  
38  
39  
40  
41  
42  
43  
44  
45  
46  
47  
48  
49  
50  
51  
52  
53  
54  
55  
56  
57  
58  
59  
60

## 1 **Discussions**

2 During the 11-year follow-up period, compared to non-participants, respondents who  
3 took part in the group for hobbies or sports once a week produced lower costs for LTCI  
4 services (approximately 3.5 and 6.1 thousand USD per person).

5 These findings are consistent with those of previous research. Most investigations  
6 suggest that social participation decreases the incidence of physical disability risk. In  
7 an intervention study examining the effect of community salons in Japan, among the  
8 participants, the incidence of physical disability risk fell by 51% over five years;<sup>28</sup>  
9 cognitive disability risk also declined by around 30% over seven years<sup>29</sup>. Several tra-  
10 jectory analyses showed that attending leisurely activities is related to “functional  
11 maintenance,”<sup>30</sup> while a low frequency of going out was related to being “persistently  
12 disabled.”<sup>31</sup> Another longitudinal study showed that a low frequency of going out was  
13 associated with tooth loss<sup>32</sup> and revealed that older adults with 20 teeth had a longer  
14 healthy life expectancy (men: +92 day, women: +70 day) compared to edentulous peo-  
15 ple.<sup>33</sup>

16 This study adds evidence to the current literature, suggesting that social participation  
17 may be effective not only for preventing functional deterioration, but also in terms of  
18 reducing LTC costs. Our findings illustrate that the more the respondents took part in  
19 each type of community activity, the less time they spent in intensive nursing care.  
20 Therefore, differences in LTCI costs may have arisen due to the extension of healthy  
21 life expectancy or a reduction in the period of functional disability, rather than re-  
22 strictions on using required services. Lifetime LTCI cost, which was estimated among  
23 deceased individuals, showed similar trends. This suggests that postponing the onset of  
24 functional disabilities or death did not cause differences in costs.

25 On the other hand, for volunteer activities, less frequent (rather than very frequent)  
26 participation resulted in lower LTCI costs. In Japan, it is often mentioned that part of  
27 participants in volunteer activities is experiencing an excessive burden. Official Japa-  
28 nese statistics revealed that half of older adults preferred volunteer activities that do  
29 not constrain their time or term.<sup>34</sup> Our results suggest that taking part in volunteer ac-  
30 tivities by force, which is not the original meaning of volunteering, might not

1 necessarily protect their health, although participating in and of itself is preventive.

2 This study has public health implications. One systematic review mentioned that most  
3 local and national public health interventions are substantially cost saving.<sup>35</sup> Our re-  
4 sults suggest that promoting participation in community activities might have a  
5 non-ignorable cost containment effect. That is, 21.8% and 12.7% of the respondents, or  
6 about 2,240 and 1,300 people, in this municipality may have been participating in a  
7 group for hobbies or sports at least once a week. If the number of these people in-  
8 creased by 10% (around 220 and 130 people), it may have been possible to reduce the  
9 cumulative cost of LTCI services by approximately 780 to 800, and 630 to 790 thou-  
10 sand USD, respectively, over the 11-year period. It is important that each activity in  
11 this paper is not a special program and is already prevalent in Japan, and that the ex-  
12 penditure to be borne by the public sector is comparatively inexpensive. Furthermore,  
13 our findings might be an underestimation, because less frequent categories for each  
14 type of social participation tended to result in a higher mortality rate.

15 Our study has several limitations and strengths. First, due to accessibility to data, we  
16 could not analyze medical care costs. A previous study mentioned that medical care  
17 and LTC expenditures have a weak, but negative, relationship.<sup>36</sup> However, to our  
18 knowledge, our study is the first to demonstrate that social participations among older  
19 adults might help lower subsequent LTCI costs. Second, generalizability is limited by  
20 the fact that our study was conducted in one municipality. However, our findings have  
21 high representativeness because we used public receipt data, which have a higher  
22 achievement rate, and the proportion of older adults and of certified LTC levels is  
23 roughly the same between the subject area and the national average. Third, it is possi-  
24 ble that our measurement of social participation does not reflect actual activities  
25 correctly due to the self-reported questionnaire. To assess the frequency and role of  
26 these groups, future research should examine interactions among participating mem-  
27 bers using objective indicators.

28

**Acknowledgments** The authors thank public and private sector staff in this community, and other JAGES group members for their helpful suggestions.

**Author Contributions** All authors contributed to the conception and design of this study. Data collection was primarily conducted by MS, YO and KK. Analyses were performed by MS and supported by JA, NK, JS and HK. MS prepared the initial manuscript and JA, NK, JS, HK, AA, and KK significantly contributed to revising it. All authors read and approved the final manuscript.

**Funding** This study was supported in part by JSPS KAKENHI (16K13443, 18H00953), the Research and Development Grants for Longevity Science from AMED (Japan Agency for Medical Research and development). The baseline survey data from the Aichi Gerontological Evaluation Study (AGES), conducted by the Center for Well-being and Society, Nihon Fukushi University as one of their research projects. This study was supported in part by MEXT-Supported Program for the Strategic Research Foundation at Private Universities, 2009-2013 and Grant-in-Aid for Scientific Research (KAKENHI) (23243070, 18390200). The funders had no role in study design, data collection and analysis, decision to publish, or preparation of the manuscript. Any credits, analyses, interpretations, conclusions, and views expressed in this paper are those of the authors, and do not necessarily reflect those of the institutions.

**Disclaimer** The funding sources had no role in study design, data collection and analysis, decision to publish or preparation of the manuscript.

**Competing interests** None declared.

**Ethics approval** This study was performed on the basis of collaborative research agreement with municipality. Ethical permission (No. 16-29) was provided by the Ethics Board at Nihon Fukushi University.

**Provenance and peer review** Not commissioned; externally peer reviewed.

**Data sharing statement** No additional data are available.

## References

1. W Greysen SR., Stijacic Cenzer I., & Boscardin WJ., (2017) Functional impairment: an unmeasured marker of medicare costs for postacute care of older adults. *J Am Geriatr Soc.* 65(9): 1996-2002.
2. National Institute of Population and Social Security Research (2017) *Population Projections for Japan: 2016-2065 (With long-range Population Projections: 2066-2115)*. ([http://www.ipss.go.jp/pp-zenkoku/j/zenkoku2017/pp29\\_ReportALL.pdf](http://www.ipss.go.jp/pp-zenkoku/j/zenkoku2017/pp29_ReportALL.pdf))
3. Ministry of Health, Labour and Welfare (2017) *Long-Term Care, Health and Welfare Services for the Elderly*. (<http://www.mhlw.go.jp/english/policy/care-welfare/care-welfare-elderly/index.html>)
4. Bukov A, Maas I, Lampert T. (2002) Social participation in very old age: cross-sectional and longitudinal findings from BASE. Berlin Aging Study. *J Gerontol B Psychol Sci Soc Sci.* 57(6): P510-P517.
5. Stuck AE., Walthert JM., & Nikolaus T., et al. (1999) Risk factors for functional status decline in community-level elderly people; a systematic literature review. *Soc Sci Med*, 48: 445-469.
6. Holt-Lunstad J. Smith TB. & Layton JB. (2010) Social relationships and mortality risk: a meta-analytic review. *PLoS Medicine.* 7(7): e1000316. doi:10.1371.
7. Cattan M. (2010) *Preventing social isolation and loneliness among older people: effectiveness of*



- 1  
2  
3 *health promotion interventions*. Saarbrücken: Lambert academic publishing.
- 4 8. Dickens AP, Richards SH, & Greaves CJ, et al. (2011) Interventions targeting social isolation in  
5 older people: a systematic review. *BMC Public Health*. 11:647.
  - 6 9. Douglas H., Georgiou A., Westbrook J., (2017) Social participation as an indicator of successful  
7 aging: an overview of concepts and their associations with health. *Australian Health Review*, 41:  
8 455-462.
  - 9 10. Webber M., & Fendt-Newlin M., (2017) A review of social participation interventions for people  
10 with mental health problems. *Soc Psychiatr Epidemiol*, 52: 369-380.
  - 11 11. Takagi D., Kondo K., & Kawachi I., et al. (2013) Social participation and mental health; moder-  
12 ating effects of gender, social role and rurality. *BMC Public Health*. 13: 701
  - 13 12. Tsuji T, Sasaki Y, & Matsuyama Y et al. (2017) Reducing depressive symptoms after the Great  
14 East Japan Earthquake in older survivors through group exercise participation and regular walk-  
15 ing: a prospective observational study. *BMJ Open*, 7(3): e013706.
  - 16 13. Shiba K., Kondo N., & Kondo K. et al. (2017) Retirement and mental health: does social parti-  
17 cipation mitigate the association? A fixed-effects longitudinal analysis. *BMC Public Health*. 17(1):  
18 526
  - 19 14. Hirai H., Kondo K., Ojima T., et al. (2009) Examination of risk factors for onset of certification  
20 of long-term care insurance in community-dwelling older people : AGES project 3-year fol-  
21 low-up study. *Jpn J Public Health*, 56(8), 501-512 (in Japanese with English abstract)
  - 22 15. Kanamori, S., Kai, Y., & Kondo, K., et al. (2012) Participation in sports organizations and the  
23 prevention of functional disability in older Japanese: the AGES cohort study. *PLoSOne*, 7(11):  
24 e51061.
  - 25 16. Kanamori S., Kai Y., & Aida J. et al. (2014) Social participation and the prevention of functional  
26 disability in older Japanese: the JAGES cohort study. *PLoS One*. 9(6): e99638.
  - 27 17. Takeda T., Kondo K., & Hirai H., et al. (2010) Psychosocial risk factors involved in progressive  
28 dementia-associated senility among the elderly residing at home AGES Project—Three year cohort  
29 longitudinal study. *Jpn J Public Health*, 57(12): 1054-1065 (in Japanese with English abstract).
  - 30 18. Saito T., Murata C., & Saito M, et al. (2018) Influence of social relationship domains and their  
31 combinations on incident dementia: a prospective cohort study. *J Epidemiol Community Health*,  
32 72(1): 7-12.
  - 33 19. Hayashi T., Kondo K., & Suzuki K., et al. (2014) Factors associated with falls in communi-  
34 ty-dwelling older people with focus on participation in sport organizations; the Japan  
35 Gerontological Evaluation Study Project. *BioMed Research International*, 537614.
  - 36 20. Noda H., Iso H., Toyoshima H., et al., (2005) Walking and sports participation and mortality from  
37 coronary heart disease and stroke. *Journal of the American College of Cardiology*, 46(9):  
38 1761-1767.
  - 39 21. Saito, M., Kondo, N., & Kondo, K., et al. (2012) Gender differences on the impacts of social ex-  
40 clusion on mortality among older Japanese: AGES cohort study. *Soc Sci Med*, 75, 940-945.
  - 41 22. Ishikawa Y., Kondo N., & Kondo K, et al. (2016) Social participation and mortality: does social  
42 position in civic groups matter? *BMC Public Health*. 16(1): 394.
  - 43 23. Ashida T., Kondo N., & Kondo K (2016) Social participation and the onset of functional disa-  
44 bility by socioeconomic status and activity type; the JAGES cohort study. *Prev Med*, 89: 121-128.
  - 45 24. Tamiya T., Noguchi H., Nishi A., et al. (2011) Population ageing and wellbeing: lessons from  
46 Japan's long-term care insurance policy. *Lancet*, 378(9797): 1183-1192
  - 47 25. McCullagh P., & Nelder JA., (1989) *Generalized Linear Models, second ed.* CRC Press.
  - 48 26. Hoshino T., & Okada K., (2006) Estimation of causal effect using propensity score methods in  
49 clinical medicine, epidemiology, pharmacoepidemiology and public health; a review. *J. Natl. Inst.*  
50 *Public Health*, 55(3): 230-243 (in Japanese with English abstract).
  - 51 27. Brookhart MA., Schneeweiss S., & Rothman KJ., et al. (2006) Variable selection for propensity  
52 score models. *Am J Epidemiol*. 163(12):1149-1156
  - 53 28. Hikichi H., Kondo N., & Kondo K, et al. (2015) Effect of community intervention program pro-  
54 moting social interactions on functional disability prevention for older adults; propensity score  
55 matching and instrumental variable analyses, JAGES Taketoyo study. *J Epidemiol Community*  
56 *Health*, 69(9):905-910.
  - 57 29. Hikichi H., Kondo K., & Takeda T, et al. (2017) Social interaction and cognitive decline; results  
58  
59



- of a 7-year community intervention. *Alzheimers Dement (N Y)*, 3: 23-32
30. Yu HW., Chiang TL., & Chen DR., et al. (2016) Trajectories of Leisure Activity and Disability in Older Adults Over 11 Years in Taiwan. *J Appl Gerontol.* 1: 733464816650800
31. Saito J., Kondo N., Saito M., et al. (2018) Exploring 2.5-year trajectories of functional decline in older adults by applying a growth mixture model and the frequency of outings as a predictor: 2010–2013 JAGES longitudinal study. *J Epidemiol*, (in press).
32. Koyama S., Aida J., & Kondo K., et al. (2016) Does poor dental health predict becoming home-bound among older Japanese? *BMC Oral Health.* 16(1): 51.
33. Matsuyama Y., Aida J., & Watt RG. et al. (2017) Dental status and compression of life expectancy with disability. *J. dent. res.* 96(9): 1006-1013.
34. Cabinet Office (2011) *Results of survey on attitude toward the senior citizens' economic life* (in Japanese) (<http://www8.cao.go.jp/kourei/ishiki/h23/sougou/zentai/index.html>)
35. Masters R., Anwar E., & Collins B., et al. (2017) Return on investment of public health interventions: a systematic review. *J Epidemiol Community Health*, 71: 827-834
36. Suzuki W., Iwamoto Y., & Yuda M., et al. (2012) The distribution patterns of medical care and long-term care expenditures. *Jpn. J. Health Econ. Policy. (Iryo-Keizai Kenkyu)*, 24(2): 86-107 (in Japanese with English abstract).

## SUPPORTING INFORMATION

Additional Supporting Information may be found in the online version of this article:

**Figure 1.** Flow chart of respondent selection.

**Table S1.** Differences of cumulative cost in LTCI services by OLS with MI, and GLM

**Table S2.** C statistics by multinomial regression model

**Table S3.** Differences of lifetime cost in LTCI services by social participation among deceased person

**Tab.1 Characteristics of respondents**

|                                           | Total      | Cumulative cost of<br>LTICI services in<br>11 years (1000USD) <sup>b)</sup> |          |
|-------------------------------------------|------------|-----------------------------------------------------------------------------|----------|
|                                           | %          | Mean ± SD                                                                   | <i>p</i> |
| Sex <sup>a)</sup>                         |            |                                                                             |          |
| Male                                      | 52.0       | 7.7 ± 24.8                                                                  |          |
| Female                                    | 48.0       | 18.7 ± 44.8                                                                 | <.001    |
| Age <sup>a)</sup>                         |            |                                                                             |          |
| (Mean±SD)                                 | (73.4±6.2) |                                                                             |          |
| 65-74                                     | 61.3       | 6.3 ± 25.2                                                                  |          |
| 75-84                                     | 33.3       | 23.0 ± 47.2                                                                 |          |
| 85+                                       | 5.4        | 39.1 ± 56.4                                                                 | <.001    |
| Disease and/or impairment <sup>a)</sup>   |            |                                                                             |          |
| None                                      | 27.2       | 10.9 ± 35.5                                                                 |          |
| Presence                                  | 64.6       | 14.3 ± 37.8                                                                 |          |
| Missing                                   | 8.3        | 17.7 ± 39.7                                                                 | =.001    |
| Years of education <sup>a)</sup>          |            |                                                                             |          |
| <6                                        | 2.7        | 30.7 ± 57.6                                                                 |          |
| 6-9                                       | 41.9       | 12.4 ± 34.9                                                                 |          |
| 10-12                                     | 24.8       | 13.1 ± 37.2                                                                 |          |
| 13+                                       | 32.2       | 11.1 ± 33.3                                                                 |          |
| Missing                                   | 10.7       | 23.2 ± 48.8                                                                 | <.001    |
| Equivalent income (1000USD) <sup>a)</sup> |            |                                                                             |          |
| <20.0                                     | 36.0       | 12.2 ± 36.5                                                                 |          |
| 20.0-39.9                                 | 27.3       | 9.5 ± 30.5                                                                  |          |
| 40.0+                                     | 6.8        | 12.0 ± 35.5                                                                 |          |
| Missing                                   | 29.9       | 19.6 ± 43.6                                                                 | <.001    |
| Marital status <sup>a)</sup>              |            |                                                                             |          |
| Married                                   | 69.2       | 9.2 ± 29.7                                                                  |          |
| Widowed                                   | 21.4       | 24.8 ± 50.2                                                                 |          |
| Divorced                                  | 1.7        | 11.0 ± 27.9                                                                 |          |
| Never married                             | 2.0        | 27.4 ± 60.1                                                                 |          |
| Missing                                   | 5.7        | 22.7 ± 45.9                                                                 | <.001    |
| Living situation <sup>a)</sup>            |            |                                                                             |          |
| Living alone                              | 10.7       | 23.8 ± 50.9                                                                 |          |
| With spouse only                          | 36.5       | 9.6 ± 30.1                                                                  |          |
| With child                                | 22.7       | 12.9 ± 35.9                                                                 |          |
| With others                               | 25.6       | 14.6 ± 39.7                                                                 |          |
| Missing                                   | 4.6        | 21.3 ± 41.6                                                                 | <.001    |
| Self rated health <sup>a)</sup>           |            |                                                                             |          |
| Excellent                                 | 6.0        | 7.9 ± 30.5                                                                  |          |
| good                                      | 61.7       | 11.5 ± 34.5                                                                 |          |
| Fair                                      | 22.5       | 18.2 ± 43.0                                                                 |          |
| Poor                                      | 5.1        | 21.7 ± 45.6                                                                 |          |
| Missing                                   | 4.7        | 18.9 ± 39.9                                                                 | <.001    |
| TOTAL                                     | 100.0      | 13.7 ± 37.4                                                                 |          |

a) These variables are based on baseline questionnaire survey.

**Tab.2 Average duration of care giving at follow-up period by social participation <sup>a)</sup>**

|                               |      | ALL            | Care Lv2+      | Care Lv4+      |
|-------------------------------|------|----------------|----------------|----------------|
|                               | n    | Mean (SD)      | Mean (SD)      | Mean (SD)      |
| <b>Hobby activities group</b> |      |                |                |                |
| Never                         | 2833 | 14.1 (25.8)    | 7.1 (17.6)     | 2.2 (8.5)      |
| A few times a year            | 259  | 9.0 (19.4)     | 3.5 ( 9.9)     | 1.2 (5.3)      |
| Once or twice a month         | 524  | 10.7 (21.8)    | 4.6 (14.4)     | 1.6 (7.5)      |
| Once a week +                 | 972  | 10.6 (21.8)    | 4.1 (13.2)     | 1.0 (6.0)      |
|                               |      | <i>p</i> <.001 | <i>p</i> <.001 | <i>p</i> <.001 |
| <b>Sports group or club</b>   |      |                |                |                |
| Never                         | 3716 | 13.7 (25.1)    | 6.6 (17.0)     | 2.1 (8.4)      |
| A few times a year            | 91   | 7.5 (19.6)     | 4.8 (16.5)     | 1.2 (5.5)      |
| Once or twice a month         | 125  | 6.0 (17.3)     | 2.7 (12.5)     | 0.5 (2.6)      |
| Once a week +                 | 572  | 7.2 (18.1)     | 2.4 (9.8)      | 0.5 (3.4)      |
|                               |      | <i>p</i> <.001 | <i>p</i> <.001 | <i>p</i> <.001 |
| <b>Volunteer group</b>        |      |                |                |                |
| Never                         | 3899 | 12.9 (24.4)    | 6.1 (16.4)     | 1.9 (7.9)      |
| A few times a year            | 194  | 7.1 (17.3)     | 2.9 (11.1)     | 1.1 (7.7)      |
| Once or twice a month         | 193  | 9.9 (21.6)     | 4.3 (13.3)     | 1.1 (7.2)      |
| Once a week +                 | 122  | 6.4 (17.5)     | 3.1 (10.9)     | 0.8 (3.2)      |
|                               |      | <i>p</i> <.001 | <i>p</i> <.001 | <i>p</i> =.019 |

Unit: month SD: Standard deviation

**Tab.3 Differences of cumulative cost in LTCI services in a 11-years follow-up period by social participation**

|                               | n    | Mean | OLS <sup>a,b)</sup>        |                                                    | Mortality |
|-------------------------------|------|------|----------------------------|----------------------------------------------------|-----------|
|                               |      |      | Coef.<br>(95%CI)           | IPW with<br>MI <sup>c,d)</sup><br>Coef.<br>(95%CI) |           |
| <b>Hobby activities group</b> |      |      |                            |                                                    |           |
| Never                         | 2833 | 14.6 | <i>ref.</i>                | <i>ref.</i>                                        | 30.8      |
| A few times a year            | 259  | 6.6  | - 3.2†<br>(-6.7 to 0.2)    | - 3.5<br>(-8.1 to 1.2)                             | 28.0      |
| Once or twice a month         | 524  | 10.2 | - 2.8†<br>(-5.8 to 0.7)    | - 2.2<br>(-5.6 to 1.2)                             | 21.7      |
| Once a week +                 | 972  | 9.4  | - 3.6**<br>(-6.0 to -1.3)  | - 3.5*<br>(-6.2 to -0.8)                           | 19.5      |
| <b>Sports group or club</b>   |      |      |                            |                                                    |           |
| Never                         | 3716 | 13.9 | <i>ref.</i>                | <i>ref.</i>                                        | 29.1      |
| A few times a year            | 91   | 9.3  | 2.5<br>(-4.9 to 9.9)       | 1.8<br>(-5.8 to 9.4)                               | 18.7      |
| Once or twice a month         | 125  | 4.8  | - 3.3<br>(-7.6 to 9.4)     | - 4.2<br>(-10.7 to 2.3)                            | 16.1      |
| Once a week +                 | 572  | 5.2  | - 4.9***<br>(-6.9 to -2.8) | - 6.1***<br>(-9.3 to -2.8)                         | 18.6      |
| <b>Volunteer group</b>        |      |      |                            |                                                    |           |
| Never                         | 3899 | 12.7 | <i>ref.</i>                | <i>ref.</i>                                        | 28.4      |
| A few times a year            | 194  | 4.8  | - 4.1**<br>(-7.1 to -1.0)  | - 3.9<br>(-9.1 to 1.3)                             | 20.7      |
| Once or twice a month         | 193  | 10.0 | 1.9<br>(-2.9 to 6.7)       | 1.5<br>(-3.8 to 6.7)                               | 12.7      |
| Once a week +                 | 122  | 5.9  | - 0.7<br>(-4.5 to 3.1)     | - 1.4<br>(-7.9 to 5.1)                             | 11.5      |

\*\*\* p<.001 \*\* p<.01 \* p<.05 † p<.10 Unit: 1000USD

OLS: Ordinal least squares, IPW: Inverse probability weighting, MI: Multiple imputation, CI: Confidential interval

a) Missing values in control variables were included as a dummy variable.

b) The result was controlled by sex, age, disease and/or impairment, years of education, equivalent income, marital status, living situation, self rated health at baseline.

c) Multiple imputation by chained equations was performed using sex, age, disease and/or impairment, years of education, equivalent income, marital status, living situation, self rated health at baseline (m=20).

d) The generalized propensity scores were calculated using multinomial regression analysis using all previously listed potential confounders: sex, age, disease and/or impairment, years of education, equivalent income, marital status, living situation, self rated health.

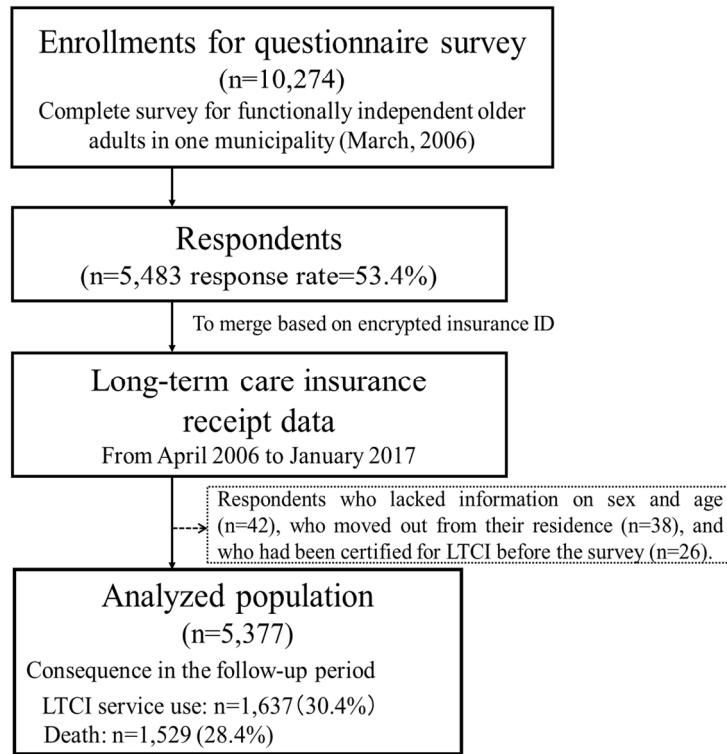

Flow chart of respondent selection.

**Table S1. Differences of cumulative cost in LTCI services by OLS with MI, and GLM**

|                               | n    | GLM <sup>a,b)</sup>         | OLS with MI <sup>b,c)</sup> |
|-------------------------------|------|-----------------------------|-----------------------------|
|                               |      | Marginal effect<br>(95%CI)  | Coef.<br>(95%CI)            |
| <b>Hobby activities group</b> |      |                             |                             |
| Never                         | 2833 |                             | <i>ref.</i>                 |
| A few times a year            | 259  | - 1.9<br>(-11.0 to 7.2)     | - 3.1†<br>(-6.6 to 0.3)     |
| Once or twice a month         | 524  | - 3.3<br>(-8.7 to 2.2)      | - 2.9†<br>(-5.8 to 0.1)     |
| Once a week +                 | 972  | - 3.5†<br>(-7.3 to 0.3)     | - 3.7*<br>(-6.0 to -1.3)    |
| <b>Sports group or club</b>   |      |                             |                             |
| Never                         | 3716 |                             | <i>ref.</i>                 |
| A few times a year            | 91   | 10.9<br>(-14.3 to 36.1)     | 2.7<br>(-4.6 to 10.0)       |
| Once or twice a month         | 125  | - 5.0<br>(-17.8 to 7.9)     | - 3.5<br>(-7.8 to 0.7)      |
| Once a week +                 | 572  | - 7.0**<br>(-11.2 to -2.9)  | - 4.9***<br>(-6.9 to -2.9)  |
| <b>Volunteer group</b>        |      |                             |                             |
| Never                         | 3899 |                             | <i>ref.</i>                 |
| A few times a year            | 194  | - 9.4***<br>(-14.1 to -4.6) | - 4.3**<br>(-7.3 to -1.2)   |
| Once or twice a month         | 193  | 2.3<br>(-8.9 to 13.6)       | 1.9<br>(-2.9 to 6.8)        |
| Once a week +                 | 122  | - 2.8<br>(-11.1 to 5.6)     | - 0.5<br>(-4.4 to 3.3)      |

\*\*\* p<.001 \*\* p<.01 \* p<.05 † p<.10 Unit: 1000 USD

GLM: Generalized linear model, OLS: Ordinal least squares, MI: Multiple imputation, CI: Confidential interval

a) Missing values in control variables were included as a dummy variable.

b) Each model was controlled by sex, age, disease and/or impairment, years of education, equivalent income, marital status, living situation, self rated health at baseline.

c) Multiple imputation by chained equations was performed using sex, age, disease and/or impairment, years of education, equivalent income, marital status, living situation, self rated health at baseline (m=20).

**Table S2. C statistics by multinomial regression model**

|                                | Hobby activities group | Sports group or club | Volunteer group |
|--------------------------------|------------------------|----------------------|-----------------|
| A few times a year vs Never    | 0.664                  | 0.757                | 0.637           |
| Once or twice a month vs Never | 0.665                  | 0.695                | 0.681           |
| Once a week + vs Never         | 0.662                  | 0.645                | 0.713           |

C statistics by multinomial regression model in order to calculate generalized propensity scores were not high: hobby activities group=.662 to .665, sports group or club=.645 to .757, volunteer group=.637 to 713. However, it is not necessarily to mean undesirable model, because the goal of a propensity score model is to efficiently control confounding, not to predict treatment or exposure.<sup>28</sup>

**Table S3. Differences of lifetime cost in LTCI services by social participation among deceased person**

|                               | n    | Mean | OLS <sup>a,b)</sup>         |                               | After Multiple Imputation <sup>c)</sup> |                                       |
|-------------------------------|------|------|-----------------------------|-------------------------------|-----------------------------------------|---------------------------------------|
|                               |      |      | Coef.<br>(95%CI)            | Marginal effect<br>(95%CI)    | OLS <sup>b)</sup><br>Coef.<br>(95%CI)   | IPW <sup>d)</sup><br>Coef.<br>(95%CI) |
| <b>Hobby activities group</b> |      |      |                             |                               |                                         |                                       |
| Never                         | 861  | 19.2 | <i>ref.</i>                 |                               | <i>ref.</i>                             | <i>ref.</i>                           |
| A few times a year            | 72   | 9.7  | - 6.0*<br>(-11.9 to - 0.1)  | - 5.6<br>(-14.9 to 3.8)       | - 5.6†<br>(-11.6 to 0.3)                | - 4.7<br>(-13.7 to 4.4)               |
| Once or twice a month         | 113  | 15.8 | - 2.0<br>(-9.1 to 5.1)      | - 0.9<br>(-9.3 to 7.6)        | - 2.1<br>(-9.2 to 4.9)                  | - 2.4<br>(-9.8 to 4.9)                |
| Once a week +                 | 188  | 12.2 | - 5.3*<br>(-10.1 to -0.4)   | - 3.9<br>(-7.3 to 0.3)        | - 5.4*<br>(-10.2 to -0.5)               | - 5.7†<br>(-11.6 to 0.3)              |
| <b>Sports group or club</b>   |      |      |                             |                               |                                         |                                       |
| Never                         | 1066 | 19.1 | <i>ref.</i>                 |                               | <i>ref.</i>                             | <i>ref.</i>                           |
| A few times a year            | 17   | 4.3  | - 8.9***<br>(-13.7 to -4.1) | - 17.8***<br>(-22.8 to -12.8) | - 8.6**<br>(-14.1 to -3.0)              | - 9.4<br>(-27.3 to 8.4)               |
| Once or twice a month         | 20   | 4.0  | - 8.6**<br>(-14.8 to -2.4)  | - 18.5***<br>(-24.0 to -13.0) | - 9.1**<br>(-15.3 to -2.8)              | - 10.1<br>(-26.6 to 6.4)              |
| Once a week +                 | 105  | 5.4  | - 9.7***<br>(-13.8 to -5.7) | - 11.4**<br>(-17.8 to -4.9)   | - 9.4***<br>(-13.4 to -5.4)             | - 11.1**<br>(-18.6 to -3.5)           |
| <b>Volunteer group</b>        |      |      |                             |                               |                                         |                                       |
| Never                         | 1091 | 16.9 | <i>ref.</i>                 |                               | <i>ref.</i>                             | <i>ref.</i>                           |
| A few times a year            | 40   | 11.2 | - 1.8<br>(-12.4 to 8.8)     | - 5.9<br>(-18.8 to 7.0)       | - 1.7<br>(-12.6 to 9.2)                 | - 2.0<br>(-13.7 to 9.8)               |
| Once or twice a month         | 24   | 20.6 | 6.2<br>(-14.9 to 27.2)      | 10.2<br>(-22.5 to 42.9)       | 7.1<br>(-13.9 to 28.0)                  | 7.6<br>(-7.4 to 22.7)                 |
| Once a week +                 | 14   | 9.3  | - 4.6<br>(-16.8 to 7.7)     | - 12.5**<br>(-20.4 to -4.7)   | - 5.1<br>(-18.1 to 7.8)                 | - 3.4<br>(-23.0 to 16.2)              |

\*\*\* p<.001 \*\* p<.01 \* p<.05 † p<.10 Unit: 1000USD

OLS: Ordinal least squares, GLM: Generalized linear model, IPW: Inverse probability weighting, CI: Confidential interval

a) Missing values in control variables were included as a dummy variable.

b) Each model was controlled by sex, age, disease and/or impairment, years of education, equivalent income, marital status, living situation, self rated health at baseline.

c) Multiple imputation by chained equations was performed using sex, age, disease and/or impairment, years of education, equivalent income, marital status, living situation, self rated health at baseline (m=20).

d) The generalized propensity scores were calculated using multinomial regression analysis using all previously listed potential confounders: sex, age, disease and/or impairment, years of education, equivalent income, marital status, living situation, self rated health. C statistics were as follows: hobby activities group=.640 to .665, sports group or club=.645 to 757, volunteer group=.637 to 713.



# Reporting checklist for cohort study.

Based on the STROBE cohort guidelines.

## Instructions to authors

Complete this checklist by entering the page numbers from your manuscript where readers will find each of the items listed below.

Your article may not currently address all the items on the checklist. Please modify your text to include the missing information. If you are certain that an item does not apply, please write "n/a" and provide a short explanation.

Upload your completed checklist as an extra file when you submit to a journal.

In your methods section, say that you used the STROBE cohort reporting guidelines, and cite them as:

von Elm E, Altman DG, Egger M, Pocock SJ, Gøtzsche PC, Vandenbroucke JP. The Strengthening the Reporting of Observational Studies in Epidemiology (STROBE) Statement: guidelines for reporting observational studies.

|                        |     | Reporting Item                                                                                                                  | Page Number |
|------------------------|-----|---------------------------------------------------------------------------------------------------------------------------------|-------------|
| Title                  | #1a | Indicate the study's design with a commonly used term in the title or the abstract                                              | 1           |
| Abstract               | #1b | Provide in the abstract an informative and balanced summary of what was done and what was found                                 | 2           |
| Background / rationale | #2  | Explain the scientific background and rationale for the investigation being reported                                            | 4           |
| Objectives             | #3  | State specific objectives, including any prespecified hypotheses                                                                | 5           |
| Study design           | #4  | Present key elements of study design early in the paper                                                                         | 6           |
| Setting                | #5  | Describe the setting, locations, and relevant dates, including periods of recruitment, exposure, follow-up, and data collection | 6           |
| Eligibility criteria   | #6a | Give the eligibility criteria, and the sources and methods of selection of participants. Describe methods of follow-up.         | 6           |

|    |                  |      |                                                                   |     |
|----|------------------|------|-------------------------------------------------------------------|-----|
| 1  |                  | #6b  | For matched studies, give matching criteria and number of         | n/a |
| 2  |                  |      | exposed and unexposed                                             |     |
| 3  |                  |      |                                                                   |     |
| 4  | Variables        | #7   | Clearly define all outcomes, exposures, predictors, potential     | 6-7 |
| 5  |                  |      | confounders, and effect modifiers. Give diagnostic criteria, if   |     |
| 6  |                  |      | applicable                                                        |     |
| 7  |                  |      |                                                                   |     |
| 8  |                  |      |                                                                   |     |
| 9  |                  |      |                                                                   |     |
| 10 | Data sources /   | #8   | For each variable of interest give sources of data and details of | 6   |
| 11 | measurement      |      | methods of assessment (measurement). Describe                     |     |
| 12 |                  |      | comparability of assessment methods if there is more than one     |     |
| 13 |                  |      | group. Give information separately for for exposed and            |     |
| 14 |                  |      | unexposed groups if applicable.                                   |     |
| 15 |                  |      |                                                                   |     |
| 16 |                  |      |                                                                   |     |
| 17 |                  |      |                                                                   |     |
| 18 | Bias             | #9   | Describe any efforts to address potential sources of bias         | 12  |
| 19 |                  |      |                                                                   |     |
| 20 |                  |      |                                                                   |     |
| 21 | Study size       | #10  | Explain how the study size was arrived at                         | 6   |
| 22 |                  |      |                                                                   |     |
| 23 | Quantitative     | #11  | Explain how quantitative variables were handled in the            | 6-7 |
| 24 | variables        |      | analyses. If applicable, describe which groupings were chosen,    |     |
| 25 |                  |      | and why                                                           |     |
| 26 |                  |      |                                                                   |     |
| 27 |                  |      |                                                                   |     |
| 28 | Statistical      | #12a | Describe all statistical methods, including those used to control | 7-8 |
| 29 | methods          |      | for confounding                                                   |     |
| 30 |                  |      |                                                                   |     |
| 31 |                  |      |                                                                   |     |
| 32 |                  | #12b | Describe any methods used to examine subgroups and                | 8   |
| 33 |                  |      | interactions                                                      |     |
| 34 |                  |      |                                                                   |     |
| 35 |                  |      |                                                                   |     |
| 36 |                  | #12c | Explain how missing data were addressed                           | 8   |
| 37 |                  |      |                                                                   |     |
| 38 |                  | #12d | If applicable, explain how loss to follow-up was addressed        | 6   |
| 39 |                  |      |                                                                   |     |
| 40 |                  |      |                                                                   |     |
| 41 |                  | #12e | Describe any sensitivity analyses                                 | 8   |
| 42 |                  |      |                                                                   |     |
| 43 | Participants     | #13a | Report numbers of individuals at each stage of study—eg           | 6   |
| 44 |                  |      | numbers potentially eligible, examined for eligibility, confirmed |     |
| 45 |                  |      | eligible, included in the study, completing follow-up, and        |     |
| 46 |                  |      | analysed. Give information separately for for exposed and         |     |
| 47 |                  |      | unexposed groups if applicable.                                   |     |
| 48 |                  |      |                                                                   |     |
| 49 |                  |      |                                                                   |     |
| 50 |                  |      |                                                                   |     |
| 51 |                  | #13b | Give reasons for non-participation at each stage                  | 6   |
| 52 |                  |      |                                                                   |     |
| 53 |                  | #13c | Consider use of a flow diagram                                    | 6   |
| 54 |                  |      |                                                                   |     |
| 55 |                  |      |                                                                   |     |
| 56 | Descriptive data | #14a | Give characteristics of study participants (eg demographic,       | 9   |
| 57 |                  |      | clinical, social) and information on exposures and potential      |     |
| 58 |                  |      |                                                                   |     |
| 59 |                  |      |                                                                   |     |
| 60 |                  |      |                                                                   |     |

|    |                  |                                                                        |       |
|----|------------------|------------------------------------------------------------------------|-------|
| 1  |                  | confounders. Give information separately for exposed and               |       |
| 2  |                  | unexposed groups if applicable.                                        |       |
| 3  |                  |                                                                        |       |
| 4  |                  | #14b Indicate number of participants with missing data for each        | 9     |
| 5  |                  | variable of interest                                                   |       |
| 6  |                  |                                                                        |       |
| 7  |                  | #14c Summarise follow-up time (eg, average and total amount)           | 6     |
| 8  |                  |                                                                        |       |
| 9  |                  |                                                                        |       |
| 10 | Outcome data     | #15 Report numbers of outcome events or summary measures               | N/A   |
| 11 |                  | over time. Give information separately for exposed and                 |       |
| 12 |                  | unexposed groups if applicable.                                        |       |
| 13 |                  |                                                                        |       |
| 14 |                  |                                                                        |       |
| 15 | Main results     | #16a Give unadjusted estimates and, if applicable, confounder-         | 9     |
| 16 |                  | adjusted estimates and their precision (eg, 95% confidence             |       |
| 17 |                  | interval). Make clear which confounders were adjusted for and          |       |
| 18 |                  | why they were included                                                 |       |
| 19 |                  |                                                                        |       |
| 20 |                  |                                                                        |       |
| 21 |                  |                                                                        |       |
| 22 |                  | #16b Report category boundaries when continuous variables were         | N/A   |
| 23 |                  | categorized                                                            |       |
| 24 |                  |                                                                        |       |
| 25 |                  |                                                                        |       |
| 26 |                  | #16c If relevant, consider translating estimates of relative risk into | N/A   |
| 27 |                  | absolute risk for a meaningful time period                             |       |
| 28 |                  |                                                                        |       |
| 29 |                  |                                                                        |       |
| 30 | Other analyses   | #17 Report other analyses done—e.g., analyses of subgroups and         | 10    |
| 31 |                  | interactions, and sensitivity analyses                                 |       |
| 32 |                  |                                                                        |       |
| 33 |                  |                                                                        |       |
| 34 | Key results      | #18 Summarise key results with reference to study objectives           | 11    |
| 35 |                  |                                                                        |       |
| 36 | Limitations      | #19 Discuss limitations of the study, taking into account sources of   | 12    |
| 37 |                  | potential bias or imprecision. Discuss both direction and              |       |
| 38 |                  | magnitude of any potential bias.                                       |       |
| 39 |                  |                                                                        |       |
| 40 |                  |                                                                        |       |
| 41 | Interpretation   | #20 Give a cautious overall interpretation considering objectives,     | 11-12 |
| 42 |                  | limitations, multiplicity of analyses, results from similar studies,   |       |
| 43 |                  | and other relevant evidence.                                           |       |
| 44 |                  |                                                                        |       |
| 45 |                  |                                                                        |       |
| 46 | Generalisability | #21 Discuss the generalisability (external validity) of the study      | 12    |
| 47 |                  | results                                                                |       |
| 48 |                  |                                                                        |       |
| 49 |                  |                                                                        |       |
| 50 | Funding          | #22 Give the source of funding and the role of the funders for the     | 13    |
| 51 |                  | present study and, if applicable, for the original study on which      |       |
| 52 |                  | the present article is based                                           |       |
| 53 |                  |                                                                        |       |
| 54 |                  |                                                                        |       |
| 55 |                  |                                                                        |       |

The STROBE checklist is distributed under the terms of the Creative Commons Attribution License CC-BY. This checklist was completed on 25. May 2018 using <http://www.goodreports.org/>, a tool made by the [EQUATOR Network](#) in collaboration with [Penelope.ai](#)

# BMJ Open

## Reduced long-term care cost by social participation among older Japanese adult: A prospective follow-up study in JAGES

|                                 |                                                                                                                                                                                                                                                                                                                                                                                                                                                                                                                                                                                                                                                                                                                                                                                                                                                                                                          |
|---------------------------------|----------------------------------------------------------------------------------------------------------------------------------------------------------------------------------------------------------------------------------------------------------------------------------------------------------------------------------------------------------------------------------------------------------------------------------------------------------------------------------------------------------------------------------------------------------------------------------------------------------------------------------------------------------------------------------------------------------------------------------------------------------------------------------------------------------------------------------------------------------------------------------------------------------|
| Journal:                        | <i>BMJ Open</i>                                                                                                                                                                                                                                                                                                                                                                                                                                                                                                                                                                                                                                                                                                                                                                                                                                                                                          |
| Manuscript ID                   | bmjopen-2018-024439.R1                                                                                                                                                                                                                                                                                                                                                                                                                                                                                                                                                                                                                                                                                                                                                                                                                                                                                   |
| Article Type:                   | Research                                                                                                                                                                                                                                                                                                                                                                                                                                                                                                                                                                                                                                                                                                                                                                                                                                                                                                 |
| Date Submitted by the Author:   | 25-Sep-2018                                                                                                                                                                                                                                                                                                                                                                                                                                                                                                                                                                                                                                                                                                                                                                                                                                                                                              |
| Complete List of Authors:       | Saito, Masashige; Nihon Fukushi University, Faculty of Social Welfare; Nihon Fukushi University, Center for Well-being and Society<br>Aida, Jun; Tohoku University Graduate School of Dentistry, International and Community Oral Health<br>kondo, naoki; University of Tokyo School of Public Health, Department of Health Economics and Epidemiology Research<br>Saito, Junko; University of Tokyo School of Public Health, Department of Health Economics and Epidemiology Research<br>Kato, Hiroataka; Keio University Graduate School of Business Administration<br>Ota, Yasuhiro; QOL 84 Plus Inc.<br>Amemiya, Airi; University of Tokyo School of Public Health, Department of Health Economics and Epidemiology Research<br>Kondo, Katsunori; Chiba University, Center for Preventive Medical Science; National Center for Geriatrics and Gerontology, Center for Gerontology and Social Science |
| <b>Primary Subject Heading</b>: | Public health                                                                                                                                                                                                                                                                                                                                                                                                                                                                                                                                                                                                                                                                                                                                                                                                                                                                                            |
| Secondary Subject Heading:      | Health services research, Health policy, Epidemiology                                                                                                                                                                                                                                                                                                                                                                                                                                                                                                                                                                                                                                                                                                                                                                                                                                                    |
| Keywords:                       | Long-term care, cumulative cost, social participation, older adults, cost containment                                                                                                                                                                                                                                                                                                                                                                                                                                                                                                                                                                                                                                                                                                                                                                                                                    |
|                                 |                                                                                                                                                                                                                                                                                                                                                                                                                                                                                                                                                                                                                                                                                                                                                                                                                                                                                                          |

SCHOLARONE™  
Manuscripts

**Title:** Reduced long-term care cost by social participation among older Japanese adult: A prospective follow-up study in JAGES

**Author names and affiliations:**

Masashige Saito<sup>1,2</sup>, Jun Aida<sup>3</sup>, Naoki Kondo<sup>4</sup>, Junko Saito<sup>4</sup>, Hiroataka Kato<sup>5</sup>, Yasuhiro Ota<sup>6</sup>, Airi Amemiya<sup>4</sup>, Katsunori Kondo<sup>2,7,8</sup>

<sup>1</sup> Faculty of Social Welfare, Nihon Fukushi University, Aichi, Japan.

<sup>2</sup> Center for Well-being and Society, Nihon Fukushi University, Aichi, Japan.

<sup>3</sup> Department of International and Community Oral Health, Tohoku University Graduate School of Dentistry, Miyagi, Japan

<sup>4</sup> Department of Health and Social Behavior, Department of Health Education and Health Sociology, School of Public Health, The University of Tokyo, Tokyo, Japan

<sup>5</sup> Graduate School of Business Administration, Keio University, Kanagawa, Japan

<sup>6</sup> QOL 84 Plus Inc., Aichi, Japan

<sup>7</sup> Center for Preventive Medical Sciences, Chiba University, Chiba, Japan

<sup>8</sup> Center for Gerontology and Social Science, National Center for Geriatrics and Gerontology, Aichi, Japan

**Corresponding author:** Masashige Saito

Faculty of Social Welfare, Nihon Fukushi University, Aichi, Japan

Okuda, Mihama-cho, Chita-gun, Aichi 470-3295, Japan

E-mail: masa-s@n-fukushi.ac.jp

**Keywords:** Long-term care, cumulative cost, social participation, older adults, cost containment

**Word counts:** 2,784 words

**Short Title:** Long-term care costs and social participation

**Number of Tables, Figures, and Supplementary Materials:**

3 tables; 1 figure; 3 supplementary materials

## Abstract

**Objectives:** Reducing costs related to functional disabilities and long-term care (LTC) is necessary in aging societies. We evaluated the differences in the cumulative cost of public long-term care insurance (LTCI) services by social participation.

**Design:** Prospective observational study.

**Setting:** Our baseline survey was conducted in March 2006 among people aged 65 or older who were not eligible for public LTCI benefits were selected using a complete enumeration in Tokoname City, Japan. We followed up with their LTC services costs over a period of 11 years. Social participation was assessed by the frequency of participation in clubs for hobbies, sports, or volunteering. We adopted a classical linear regression analysis and an inverse probability weighting (IPW), with multiple imputation of missing values

**Participants:** Functionally independent 5,377 older adults.

**Primary outcome measures:** The cumulative cost of public LTCI services for 11 years.

**Results:** Even when adjusting for the confounding variables, social participation at the baseline was negatively associated with the cumulative cost of LTCI services. The IPW model showed that respondents who participated in hobby activities once a week or more, the cumulative cost of LTCI services for 11 years was lower approximately 3,500 USD per person, in comparison to non-participants. Similarly, that in respondents who participated in sports group or clubs was lower approximately 6,000 USD than non-participants.

**Conclusions:** Older adults' participation in community organizations may help reduce future LTC costs. Promoting participation opportunities in the community could ensure the financial stability of LTCI services.

### 1 **Strengths and limitations of this study**

- 2 ● To our knowledge, this is the first to demonstrate that social participations among  
3 older adults might help lower subsequent LTCI costs.
- 4 ● Our findings are based on eleven-years prospective observational study using public  
5 LTCI receipt data in Japan.
- 6 ● Selection bias might have occurred because of the 53% response rate to the base-  
7 line survey.
- 8 ● The measurements of social participation rely on self-reported questionnaire.

## 1 **Main text**

### 2 **Introduction**

3 Across the globe, costs related to functional disabilities and long-term care (LTC) are  
4 rapidly increasing in societies with aging populations. Expenses are greater among  
5 those with more severe impairments.<sup>1</sup> In Japan, one of the countries experiencing the  
6 highest rate of aging, the proportion of older people is currently 27.3% and is predicted  
7 to reach around 40% by 2065.<sup>2</sup> Under these circumstances, the costs for long-term care  
8 insurance (LTCI) are expected to rise from 100 billion USD in 2016 to 210 billion  
9 USD by 2025.

10 Lowering these costs requires building a sustainable and healthy aging society which  
11 means developing and maintaining the functional ability that enables well-being in  
12 older age. The Japanese government implemented a public nursing care insurance law  
13 that includes an LTC prevention policy.<sup>3</sup> For this policy, a population approach as pri-  
14 mary prevention was proposed rather than a high-risk one which was grounded in risk  
15 screening based on intervention targeting. Promoting social participation is considered  
16 an effective intervention regarding the population approach, which focuses on the en-  
17 tire group of older adults in a community.

18 Although social participation is an ambiguous concept, Bukov (2002) distinguished  
19 three types of participation: collective, productive, and political.<sup>4</sup> In this paper, we fo-  
20 cused on involvement in collective activities in formal and informal societal groups at  
21 local community. Social participation helps maintain social networks, support, and  
22 roles, raises self-esteem and self-efficacy, and facilitates access to various kinds of in-  
23 formation. Several international systematic reviews and meta-analyses have reported  
24 on the physical, psychological, and social benefits of social participation among older  
25 people.<sup>5-10</sup> For instance, meta-analysis across 148 articles mentioned active engage-  
26 ment in social activities could reduce risk for mortality. In particular, previous  
27 observational studies in Japan also found that collective social participation activities  
28 such as volunteering, sports clubs, and hobbies among older adults lowered the risk of  
29 developing depressive symptoms,<sup>11-13</sup> the incidence of functional disabilities,<sup>14-16</sup> cog-  
30 nitive decline or dementia,<sup>17,18</sup> falls,<sup>19</sup> and immature death.<sup>20-23</sup>



1 We hypothesize that if social participation extends healthy life expectancy and reduces  
2 the time spent in intensive nursing care, then the cumulative cost of LTCI services  
3 might be lower among the participants; however, to our knowledge, there is no evi-  
4 dence that social participation lessens it. In addition, Japanese LTCI services are  
5 provided mainly when people aged 65 and over come to require care or support, based  
6 on investigation for certification and doctor's written opinion. The cost of LTCI ser-  
7 vices is one of the most important issues for the public sector as an insurer. The  
8 evidence for contributing to cost-saving has been useful for recent intervention financ-  
9 ing schemes that provide economic incentives to service providers; for instance, social  
10 impact bonds (SIBs). In this paper, using data from a follow-up study that took place  
11 over a period of 11 years and tracked older Japanese adults, we assessed the differ-  
12 ences of the duration period of requiring care level and of the cumulative cost of LTCI  
13 services by frequency of social participation in baseline survey.

14

## 1 **Methods**

### 2 ***Study design***

3 The Japan Gerontological Evaluation Study (JAGES) conducted a self-administered  
4 questionnaire in March 2006 as a baseline; 5,483 respondents who were 65 years or  
5 older, physically and cognitively independent, and not eligible for public LTCI bene-  
6 fits were selected using a complete enumeration; they live in the city of Tokoname in  
7 Aichi Prefecture (response rate=53.4%: 5,483 / 10,274). In addition, our subjects were  
8 more healthy or active older adults at baseline, because Japanese LTCI certifies the  
9 people included mild care needs, not only severe care level. Afterward, we obtained  
10 receipt data on LTCI benefits over a period of 11 years after the baseline survey, from  
11 government database of public LTCI. After eliminating respondents who lacked in-  
12 formation on sex and age (n=42), who had moved out of their residence (n=38), and  
13 who had been certified for LTCI before the baseline survey (n=26), 5,377 respondents  
14 were linked to the LTCI receipt dataset (**Figure 1**). Out of this amount, 30.4% had  
15 used LTCI services at least once, and 28.4% passed away during the follow-up period.

### 16 ***Measurements***

#### 17 **Outcome variables; the costs of LTCI services**

18 Primary outcome variable is the cumulative cost of LTCI services at follow-up period.  
19 We obtained the LTC costs of insured services across forty-four points every three  
20 months (April, July, October, January) over a period of 11 years. We summed them up  
21 after tripling these monthly costs in order to calculate an approximate value of the  
22 overall cost for the follow-up period. We used the currency exchange rate of 100JPY  
23 to 1USD. As closely related variable, we calculated the number of months which was  
24 eligible for LTCI benefit across the whole population, from care level 5 which signifies  
25 the highest level of requirement for LTC to any care or support level.

26 In addition, Japanese LTCI operates based on social insurance principles. Only ser-  
27 vices are provided, not cash allowances, and recipients can choose their services and  
28 providers.<sup>24</sup> The receipt data includes information about using insured services such as  
29 home visits, day, short-stay, residential, or in-facility services. The data do not include  
30

1 costs, which are not covered by insurance (such as food, housing, and diaper expenses).  
2 In general, 10% of these costs are co-payments (the municipality, which acts as an in-  
3 surer, pays 90%), although there is a upper limit to the amount of monthly insurance  
4 benefits, which differs depending on the needed level of care. People with certifica-  
5 tions for LTC and who need (levels 1 to 5) or require support (levels 1 or 2) can use  
6 LTCI services. Those higher levels of care can utilize more LTCI services through in-  
7 surance coverage. The cumulative cost of such care in the following cases is zero:  
8 deceased individuals who did not have functional disabilities, respondents who did not  
9 have proper certification, and non-service users.

### 10 **Explanatory variables: Social participation**

11 The indicator of social participation was taken from the Japanese General Social Sur-  
12 vey,<sup>25</sup> and categorized organizations into following eight types: hobby activities group,  
13 sports group or club, volunteer group, neighborhood association, senior citizen  
14 club/fire-fighting team, religious group, political organization or group, industrial or  
15 trade association, and citizen or consumer group. We focused on the three  
16 groups/organizations previously identified as being associated with lower risks for  
17 functional disabilities; hobby activities group,<sup>17,26</sup> sports group or club,<sup>15,26</sup> and volun-  
18 teer group.<sup>27,28</sup> According to principal components analysis, these community activities  
19 were categorized to horizontal organizations.<sup>29,30</sup> Respondents were asked how often  
20 they took part in these activities. We categorized them to the four frequencies, respec-  
21 tively; *never*; *a few times a year*; *once or twice a month*; and *once a week or more*.

### 22 **Covariates**

23 Demographic variables included sex, age, educational attainment, equivalent income  
24 (USD), marital status, and living situation at the baseline survey. Age was a continuous  
25 variable (73.4±6.2). Years of education was categorized as <6, 6-9, 10-12, and 13+.  
26 We equalized household income by the square root of the numbers and classified it as  
27 <20.0, 20.0-39.9, and 40.0+ thousand USD. Marital status consisted of *married*, *wid-*  
28 *owed*, *divorced*, and *never married*. Living situation was categorized as *living alone*,  
29 *with one's spouse only*, *with a child*, or *with others* such as grandchildren, siblings, and  
30 relatives.

1 In order to account for the health status at the baseline, the presence of disease or im-  
2 pairment and self-rated health were considered. The presence of disease or impairment  
3 was based on self-reported medical condition (no illness, having illness but need no  
4 treatment, having illness but discontinued treatment, and receiving some treatment).  
5 We dichotomized it; that is, no illness or not. We assessed self-rated health using four  
6 categories: *excellent*, *good*, *fair*, and *poor*.

### 7 8 **Statistical analysis**

9 After calculating the descriptive statistics, we conducted four regression analyses. First,  
10 we adopted a classical linear regression (ordinary linear squares [OLS]) model, con-  
11 trolling covariates at baseline survey. We handled the missing value in each control  
12 variable as a dummy variable. Second, as one of robustness check, we predicted the  
13 marginal effects, adopting a generalized linear model (GLM)<sup>31</sup> with Gamma distribu-  
14 tion, as well as the log link and robust variance estimator, because our dependent  
15 variable (the cumulative cost of LTCI services) is not normally distributed. Next, we  
16 performed a multiple imputation technique by chained equations under the missing at  
17 random assumption, which means there might be systematic differences between the  
18 missing and observed values. We created twenty imputed datasets. Using each dataset,  
19 we first estimated the OLS model with the robust variance estimator. Finally, in order  
20 to estimate the potential outcomes after conditioning on the covariates, we adopted the  
21 inverse probability weighting (IPW) model<sup>32,33</sup> using the imputed data sets. We calcu-  
22 lated the generalized propensity scores using multinomial regression analysis,  
23 employing all previously listed covariates. For reference, we only examined the same  
24 model among the deceased, who passed away during the follow-up period. The LTCI  
25 costs for the deceased indicates the “lifetime cost” of LTCI because they did not use  
26 LTCI services at the baseline. We performed analyses using STATA 15.1 (STATA  
27 Corp LP, College Station, Texas, USA).

### 28 29 **Patient and public involvement**

30 No patient or the public was involved in the development of research question and de-

1  
2  
3  
4  
5  
6  
7  
8  
9  
10  
11  
12  
13  
14  
15  
16  
17  
18  
19  
20  
21  
22  
23  
24  
25  
26  
27  
28  
29  
30  
31  
32  
33  
34  
35  
36  
37  
38  
39  
40  
41  
42  
43  
44  
45  
46  
47  
48  
49  
50  
51  
52  
53  
54  
55  
56  
57  
58  
59  
60

1 sign of this study. The results of this research will be disseminated to stakeholders such  
2 as local and central health government after being published in a scientific journal.  
3  
4  
5

For peer review only

## Results

**Table 1** shows the characteristics of the respondents; the mean age at the baseline was 73.4; 52.0% of the respondents were male. The average of the cumulative cost of LTCI services during the follow-up period was 13.7 thousand USD. The distribution of that was skewed right. There were significant differences in the average duration for the level of care required for social participation across the whole population during the follow-up period (**Table 2**). Non-participants in groups for hobbies, sports, and volunteering had a longer duration of certification for LTC at all care levels. For example, among participants who took part in the group for hobbies, the average duration for non-participants was 14.1 (standard deviation [SD]=25.8) months, whereas that of those who participated “once a week or more” was 10.6 (SD=21.6) months.

The classical regression model showed that in comparison to non-participants, respondents who participated in the group for hobbies once a week produced a cost containment in 3.6 (95% confidence interval [CI]: 6.0 to 1.3) thousand USD, which was lower per person for LTCI cumulative costs over the 11-year period (**Table 3**). Likewise, participating in a sports club was also significantly associated with lower LTCI costs: the category of those who took part “once a week or more” was 4.9 [95% CI: 6.9 to 2.8] thousand USD less per person. However, in the volunteer group, only less frequent participation was associated with lower costs; for individuals in the category of “a few times a year” this figure was 4.1 [95% CI: 7.1 to 1.0] thousand USD less per person. When we changed the estimation method to GLM, and when we adopted OLS after multiple imputation, the major results and trends were similar to the above, although some point estimations in GLM were higher in the categories that had a small sample size (please see **Supplementary File 1**).

The estimations of IPW showed similar outcomes. In comparison to non-participants, going to a group for hobbies once a week or more resulted in a cost that was reduced by approximately 3.5 [95% CI: 6.2 to 0.8] thousand USD; for sports clubs, this lowered figure was approximately 6.1 [95% CI: 9.3 to 2.8] thousand USD. The significant relationship with less frequent participation in the volunteer group disappeared, but the

1  
2  
3  
4  
5 1 direction of the association and point estimations did not largely change (the C statis-  
6 2 tics in these models are shown in **Supplementary File 2**).

7  
8 3 In addition, in comparison to non-participants, for deceased individuals during the fol-  
9 4 low-up period, joining a group for hobbies (once a week+) or sports (once a week+)  
10 5 led to a reduced cost of approximately 3.9 to 5.7 thousand USD, and 9.4 to 11.4 thou-  
11 6 sand USD, respectively (please see **Supplementary File 3**). These outcomes are  
12 7 preliminary because there were very few analyzed subjects (especially the sports and  
13 8 volunteer groups).  
14  
15  
16  
17  
18  
19  
20  
21  
22  
23  
24  
25  
26  
27  
28  
29  
30  
31  
32  
33  
34  
35  
36  
37  
38  
39  
40  
41  
42  
43  
44  
45  
46  
47  
48  
49  
50  
51  
52  
53  
54  
55  
56  
57  
58  
59  
60

## Discussions

According to the 11-year prospective cohort study for Japanese healthy older adults, compared to non-participants, respondents who took part in the group for hobbies or sports once a week produced lower costs for LTCI services (approximately 3.5 and 6.1 thousand USD per person), even after demographic variables and health status at baseline were controlled.

These findings are consistent with those of previous research. Several longitudinal studies showed that older adults who participate in social activities have lower risks of disability,<sup>34</sup> functional decline,<sup>35,36</sup> and mobility decline.<sup>37,38</sup> Moreover, it has been suggested that participation to hobby groups, sports club, and volunteer group might contribute to reduce the incidence of physical disability risk.<sup>15,17,26-28</sup> In an intervention study examining the effect of community salons in Japan, among the participants, the incidence of physical disability risk fell by 51% over five years;<sup>39</sup> cognitive disability risk also declined by around 30% over seven years.<sup>40</sup> Several trajectory analyses showed that attending leisurely activities is related to “functional maintenance,”<sup>41</sup> while a low frequency of going out was related to being “persistently disabled.”<sup>42</sup>

This study adds evidence to the current literature, suggesting that social participation may be effective not only for preventing functional deterioration, but also in terms of reducing LTC costs. Our findings illustrate that the more the respondents took part in each type of community activity, the less time they spent in intensive nursing care. Therefore, differences in LTCI costs may have arisen due to the extension of healthy life expectancy or a reduction in the period of functional disability, rather than restrictions on using required services. Lifetime LTCI cost, which was estimated among deceased individuals, showed similar trends. This suggests that postponing the onset of functional disabilities or death did not cause differences in costs.

On the other hand, for volunteer activities, less frequent (rather than very frequent) participation resulted in lower LTCI costs. In Japan, it is often mentioned that part of participants in volunteer activities is experiencing an excessive burden. Official Japanese statistics revealed that half of older adults preferred volunteer activities that do not constrain their time or term.<sup>43</sup> Our results suggest that taking part in volunteer ac-



1  
2  
3  
4  
5 1 activities by force, which is not the original meaning of volunteering, might not neces-  
6 2 sarily protect their health, although participating in and of itself is preventive.  
7  
8 3 This study has public health implications. One systematic review mentioned that most  
9  
10 4 local and national public health interventions are substantially cost saving.<sup>44</sup> Our re-  
11 5 sults suggest that promoting participation in community activities might have a  
12 6 non-ignorable cost containment effect. That is, 21.8% and 12.7% of the respondents, or  
13 7 about 2,240 and 1,300 people, in this municipality may have been participating in a  
14 8 group for hobbies or sports at least once a week. If the number of these people in-  
15 9 creased by 10% (around 220 and 130 people), it may have been possible to reduce the  
16 10 cumulative cost of LTCI services by approximately 780 to 800, and 630 to 790 thou-  
17 11 sand USD, respectively, over the 11-year period. It is important that each activity in  
18 12 this paper is not a special program and is already prevalent in Japan, and that the ex-  
19 13 penditure to be borne by the public sector is comparatively inexpensive. Furthermore,  
20 14 our findings might be an underestimation, because less frequent categories for each  
21 15 type of social participation tended to result in a higher mortality rate.  
22 16 Our study has several limitations and strengths. First, due to accessibility to data, we  
23 17 could not analyze medical care costs. A previous study mentioned that medical care  
24 18 and LTC expenditures have a weak, but negative, relationship.<sup>45</sup> However, to our  
25 19 knowledge, our study is the first to demonstrate that social participations among older  
26 20 adults might help lower subsequent LTCI costs. Second, we assessed social participa-  
27 21 tion variables and covariates only at the baseline. Our study analyzed healthy older  
28 22 adults; we excluded those with physically and cognitively disabilities at baseline; we  
29 23 controlled for multiple health dimensions and other covariates, adopting several statis-  
30 24 tical techniques. However, we cannot deny the possibility of reverse causation. Third,  
31 25 generalizability might be limited by the fact that our study was conducted in one mu-  
32 26 nicipality, although the proportion of older adults and of certified LTC levels is roughly  
33 27 the same between the subject area and the national average. Selection bias might have  
34 28 occurred because the response rate in baseline survey was not high (53.4%). However,  
35 29 there was important meanings to analyze the merged individual data from a question-  
36 30 naire concerning social life and a public receipt data concerning LTC services. Fourth,

1  
2  
3  
4  
5 1 there might be measurement bias about social participation because it derived from the  
6 2 self-reported questionnaire. Although our indicators have been often used in previous  
7 3 survey, it is possible that it does not reflect actual activities correctly since the  
8 4 self-reported one. To assess the frequency and role of these groups, future research  
9 5 should examine interactions among participating members using objective indicators.  
10 6  
11 7  
12 8  
13  
14  
15  
16  
17  
18  
19  
20  
21  
22  
23  
24  
25  
26  
27  
28  
29  
30  
31  
32  
33  
34  
35  
36  
37  
38  
39  
40  
41  
42  
43  
44  
45  
46  
47  
48  
49  
50  
51  
52  
53  
54  
55  
56  
57  
58  
59  
60

**Acknowledgments** The authors thank public and private sector staff in this community, and other JAGES group members for their helpful suggestions.

**Author Contributions** All authors contributed to the conception and design of this study. Data collection was primarily conducted by MS, YO and KK. Analyses were performed by MS and supported by JA, NK, JS and HK. MS prepared the initial manuscript and JA, NK, JS, HK, AA, and KK significantly contributed to revising it. All authors read and approved the final manuscript.

**Funding** This study was supported in part by JSPS KAKENHI (16K13443, 18H00953), the Research and Development Grants for Longevity Science from AMED (Japan Agency for Medical Research and development). The baseline survey data from the Aichi Gerontological Evaluation Study (AGES), conducted by the Center for Well-being and Society, Nihon Fukushi University as one of their research projects. This study was supported in part by MEXT-Supported Program for the Strategic Research Foundation at Private Universities, 2009-2013 and Grant-in-Aid for Scientific Research (KAKENHI) (23243070, 18390200). The funders had no role in study design, data collection and analysis, decision to publish, or preparation of the manuscript. Any credits, analyses, interpretations, conclusions, and views expressed in this paper are those of the authors, and do not necessarily reflect those of the institutions.

**Disclaimer** The funding sources had no role in study design, data collection and analysis, decision to publish or preparation of the manuscript.

**Competing interests** None declared.

**Ethics approval** This study was performed on the basis of collaborative research agreement with municipality. Ethical permission (No. 16-29) was provided by the Ethics Board at Nihon Fukushi University.

**Provenance and peer review** Not commissioned; externally peer reviewed.

**Data sharing statement** We can NOT publish our dataset. The dataset has ethical or legal restrictions because it includes human participants.

## References

1. W Greysen SR., Stijacic Cenzer I., & Boscardin WJ., (2017) Functional impairment: an unmeasured marker of medicare costs for postacute care of older adults. *J Am Geriatr Soc.* 65(9): 1996-2002.
2. National Institute of Population and Social Security Research (2017) *Population Projections for Japan: 2016-2065 (With long-range Population Projections: 2066-2115)*. ([http://www.ipss.go.jp/pp-zenkoku/j/zenkoku2017/pp29\\_ReportALL.pdf](http://www.ipss.go.jp/pp-zenkoku/j/zenkoku2017/pp29_ReportALL.pdf))
3. Ministry of Health, Labour and Welfare (2017) *Long-Term Care, Health and Welfare Services for the Elderly*. (<http://www.mhlw.go.jp/english/policy/care-welfare/care-welfare-elderly/index.html>)
4. Bukov A, Maas I, Lampert T. (2002) Social participation in very old age: cross-sectional and longitudinal findings from BASE. Berlin Aging Study. *J Gerontol B Psychol Sci Soc Sci.* 57(6): P510-P517.
5. Stuck AE., Walthert JM., & Nikolaus T., et al. (1999) Risk factors for functional status decline in community-level elderly people; a systematic literature review. *Soc Sci Med*, 48: 445-469.
6. Holt-Lunstad J. Smith TB. & Layton JB. (2010) Social relationships and mortality risk: a meta-analytic review. *PLoS Medicine.* 7(7): e1000316. doi:10.1371.

7. Cattan M. (2010) *Preventing social isolation and loneliness among older people: effectiveness of health promotion interventions*. Saarbrücken: Lambert academic publishing.
8. Dickens AP, Richards SH, & Greaves CJ, et al. (2011) Interventions targeting social isolation in older people: a systematic review. *BMC Public Health*. 11:647.
9. Douglas H., Georgiou A., Westbrook J., (2017) Social participation as an indicator of successful aging: an overview of concepts and their associations with health. *Australian Health Review*, 41: 455-462.
10. Webber M., & Fendt-Newlin M., (2017) A review of social participation interventions for people with mental health problems. *Soc Psychiatr Epidemiol*, 52: 369-380.
11. Takagi D., Kondo K., & Kawachi I., et al. (2013) Social participation and mental health; moderating effects of gender, social role and rurality. *BMC Public Health*. 13: 701
12. Tsuji T, Sasaki Y, & Matsuyama Y et al. (2017) Reducing depressive symptoms after the Great East Japan Earthquake in older survivors through group exercise participation and regular walking: a prospective observational study. *BMJ Open*, 7(3): e013706.
13. Shiba K., Kondo N., & Kondo K. et al. (2017) Retirement and mental health: does social participation mitigate the association? A fixed-effects longitudinal analysis. *BMC Public Health*. 17(1): 526
14. Hirai H., Kondo K., Ojima T., et al. (2009) Examination of risk factors for onset of certification of long-term care insurance in community-dwelling older people : AGES project 3-year follow-up study. *Jpn J Public Health*, 56(8), 501-512 (in Japanese with English abstract)
15. Kanamori, S., Kai, Y., & Kondo, K., et al. (2012) Participation in sports organizations and the prevention of functional disability in older Japanese: the AGES cohort study. *PLoSOne*, 7(11): e51061.
16. Kanamori S., Kai Y., & Aida J. et al. (2014) Social participation and the prevention of functional disability in older Japanese: the JAGES cohort study. *PLoS One*. 9(6): e99638.
17. Takeda T., Kondo K., & Hirai H., et al. (2010) Psychosocial risk factors involved in progressive dementia-associated senility among the elderly residing at home AGES Project—Three year cohort longitudinal study. *Jpn J Public Health*, 57(12): 1054-1065 (in Japanese with English abstract).
18. Saito T., Murata C., & Saito M, et al. (2018) Influence of social relationship domains and their combinations on incident dementia: a prospective cohort study. *J Epidemiol Community Health*, 72(1): 7-12.
19. Hayashi T., Kondo K., & Suzuki K., et al. (2014) Factors associated with falls in community-dwelling older people with focus on participation in sport organizations; the Japan Gerontological Evaluation Study Project. *BioMed Research International*, 537614.
20. Noda H., Iso H., Toyoshima H., et al., (2005) Walking and sports participation and mortality from coronary heart disease and stroke. *Journal of the American College of Cardiology*, 46(9): 1761-1767.
21. Saito, M., Kondo, N., & Kondo, K., et al. (2012) Gender differences on the impacts of social exclusion on mortality among older Japanese: AGES cohort study. *Soc Sci Med*, 75, 940-945.
22. Ishikawa Y., Kondo N., & Kondo K, et al. (2016) Social participation and mortality: does social position in civic groups matter? *BMC Public Health*. 16(1): 394.
23. Ashida T., Kondo N., & Kondo K (2016) Social participation and the onset of functional disability by socioeconomic status and activity type; the JAGES cohort study. *Prev Med*, 89: 121-128.
24. Tamiya T., Noguchi H., Nishi A., et al. (2011) Population ageing and wellbeing: lessons from Japan's long-term care insurance policy. *Lancet*, 378(9797): 1183-1192
25. Osaka university commerce JGSS Research Center. Summary of Surveys. ([http://jgss.daishodai.ac.jp/english/surveys/sur\\_top.html](http://jgss.daishodai.ac.jp/english/surveys/sur_top.html))
26. Ashida T., Kondo N., Kondo K. (2016) Social participation and the onset of functional disability by socioeconomic status and activity type: the JAGES cohort study. *Prev Med*, 89: 121-128.
27. Lum T.Y., & Lightfoot E. (2005) The effects of volunteering on the physical and mental health of older people. *Res Aging*, 27(1): 31-55.
28. Musick M.A., & Wilson J. (2003) Volunteering and depression: the role of psychological and social resources in different age group. *Soc Sci Med*, 56(2) 259-269.
29. Aida J., Hanibuchi T., & Nakade M., et al. (2009) The different effects of vertical social capital and horizontal social capital on dental status: a multilevel analysis. *Soc Sci Med*. 69(4): 512-518

30. Yazawa A., Inoue Y., & Fujiwara T., et al. (2016) Association between social participation and hypertension among older people in Japan: the JAGES Study. *Hypertens Res.* 39(11):818-824.
31. McCullagh P., & Nelder J.A., (1989) *Generalized Linear Models, second ed.* CRC Press.
32. Hoshino T., & Okada K., (2006) Estimation of causal effect using propensity score methods in clinical medicine, epidemiology, pharmacoepidemiology and public health; a review. *J. Natl. Inst. Public Health*, 55(3): 230-243 (in Japanese with English abstract).
33. Brookhart MA., Schneeweiss S., & Rothman KJ., et al. (2006) Variable selection for propensity score models. *Am J Epidemiol.* 163(12):1149-1156
34. Mendes de Leon C.F., Glass T.A., Berkman L.F. (2003) Social engagement and disability in a community population of older adults: the New Haven EPESE. *Am J Epidemiol.* 157(7): 633-642.
35. James B.D., Boyle P.A., Buchman A.S., et al. (2011) Relation of late-life social activity with incident disability among community-dwelling older adults. *J Gerontol A Biol Sci Med Sci*, 66A(4):467-473
36. Thomas PA. (2011) Trajectories of social engagement and limitations in late life. *J Health Soc Behav*, 52(4): 430-443.
37. Avlund K., Vass M., & Hendriksen C. (2003) Onset of mobility disability among community-dwelling old men and women: the role of tiredness in daily activities. *Age Ageing* 32(6): 579-584
38. Buchman A.S., Boyle P.A., & Wilson R.S., et al. (2009) Association between late-life social activity and motor decline in older adults. *Arch Intern Med*, 169(12): 1139-1146.
39. Hikichi H., Kondo N., & Kondo K., et al. (2015) Effect of community intervention program promoting social interactions on functional disability prevention for older adults; propensity score matching and instrumental variable analyses, JAGES Taketoyo study. *J Epidemiol Community Health*, 69(9):905-910.
40. Hikichi H., Kondo K., & Takeda T., et al. (2017) Social interaction and cognitive decline; results of a 7-year community intervention. *Alzheimers Dement (N Y)*, 3: 23-32
41. Yu HW., Chiang TL., & Chen DR., et al. (2016) Trajectories of Leisure Activity and Disability in Older Adults Over 11 Years in Taiwan. *J Appl Gerontol.* 1: 733464816650800
42. Saito J., Kondo N., Saito M., et al. (2018) Exploring 2.5-year trajectories of functional decline in older adults by applying a growth mixture model and the frequency of outings as a predictor: 2010–2013 JAGES longitudinal study. *J Epidemiol*, (in press).
43. Cabinet Office (2011) *Results of survey on attitude toward the senior citizens' economic life* (in Japanese) (<http://www8.cao.go.jp/kourei/ishiki/h23/sougou/zentai/index.html>)
44. Masters R., Anwar E., & Collins B., et al. (2017) Return on investment of public health interventions: a systematic review. *J Epidemiol Community Health*, 71: 827-834
45. Suzuki W., Iwamoto Y., & Yuda M., et al. (2012) The distribution patterns of medical care and long-term care expenditures. *Jpn. J. Health Econ. Policy. (Iryo-Keizai Kenkyu)*, 24(2): 86-107 (in Japanese with English abstract).

## SUPPORTING INFORMATION

Additional Supporting Information may be found in the online version of this article:

**Figure 1.** Flow chart of respondent selection.

**Table S1.** Differences of cumulative cost in LTCI services by OLS with MI, and GLM

**Table S2.** C statistics by multinomial regression model

**Table S3.** Differences of lifetime cost in LTCI services by social participation among deceased person

**Tab.1 Characteristics of respondents**

|                                           | Total      | Cumulative cost of<br>LTCI services in<br>11 years (1000USD) <sup>b)</sup> |          |
|-------------------------------------------|------------|----------------------------------------------------------------------------|----------|
|                                           | %          | Mean ± SD                                                                  | <i>p</i> |
| Sex <sup>a)</sup>                         |            |                                                                            |          |
| Male                                      | 52.0       | 7.7 ± 24.8                                                                 |          |
| Female                                    | 48.0       | 18.7 ± 44.8                                                                | <.001    |
| Age <sup>a)</sup>                         |            |                                                                            |          |
| (Mean±SD)                                 | (73.4±6.2) |                                                                            |          |
| 65-74                                     | 61.3       | 6.3 ± 25.2                                                                 |          |
| 75-84                                     | 33.3       | 23.0 ± 47.2                                                                |          |
| 85+                                       | 5.4        | 39.1 ± 56.4                                                                | <.001    |
| Disease and/or impairment <sup>a)</sup>   |            |                                                                            |          |
| None                                      | 27.2       | 10.9 ± 35.5                                                                |          |
| Presence                                  | 64.6       | 14.3 ± 37.8                                                                |          |
| Missing                                   | 8.3        | 17.7 ± 39.7                                                                | =.001    |
| Years of education <sup>a)</sup>          |            |                                                                            |          |
| <6                                        | 2.7        | 30.7 ± 57.6                                                                |          |
| 6-9                                       | 41.9       | 12.4 ± 34.9                                                                |          |
| 10-12                                     | 24.8       | 13.1 ± 37.2                                                                |          |
| 13+                                       | 32.2       | 11.1 ± 33.3                                                                |          |
| Missing                                   | 10.7       | 23.2 ± 48.8                                                                | <.001    |
| Equivalent income (1000USD) <sup>a)</sup> |            |                                                                            |          |
| <20.0                                     | 36.0       | 12.2 ± 36.5                                                                |          |
| 20.0-39.9                                 | 27.3       | 9.5 ± 30.5                                                                 |          |
| 40.0+                                     | 6.8        | 12.0 ± 35.5                                                                |          |
| Missing                                   | 29.9       | 19.6 ± 43.6                                                                | <.001    |
| Marital status <sup>a)</sup>              |            |                                                                            |          |
| Married                                   | 69.2       | 9.2 ± 29.7                                                                 |          |
| Widowed                                   | 21.4       | 24.8 ± 50.2                                                                |          |
| Divorced                                  | 1.7        | 11.0 ± 27.9                                                                |          |
| Never married                             | 2.0        | 27.4 ± 60.1                                                                |          |
| Missing                                   | 5.7        | 22.7 ± 45.9                                                                | <.001    |
| Living situation <sup>a)</sup>            |            |                                                                            |          |
| Living alone                              | 10.7       | 23.8 ± 50.9                                                                |          |
| With spouse only                          | 36.5       | 9.6 ± 30.1                                                                 |          |
| With child                                | 22.7       | 12.9 ± 35.9                                                                |          |
| With others                               | 25.6       | 14.6 ± 39.7                                                                |          |
| Missing                                   | 4.6        | 21.3 ± 41.6                                                                | <.001    |
| Self rated health <sup>a)</sup>           |            |                                                                            |          |
| Excellent                                 | 6.0        | 7.9 ± 30.5                                                                 |          |
| good                                      | 61.7       | 11.5 ± 34.5                                                                |          |
| Fair                                      | 22.5       | 18.2 ± 43.0                                                                |          |
| Poor                                      | 5.1        | 21.7 ± 45.6                                                                |          |
| Missing                                   | 4.7        | 18.9 ± 39.9                                                                | <.001    |
| TOTAL                                     | 100.0      | 13.7 ± 37.4                                                                |          |

a) These variables are based on baseline questionnaire survey.

**Tab.2 Average duration of care giving at follow-up period by social participation <sup>a)</sup>**

|                               |      | ALL <sup>a)</sup> | Care Lv1+      | Care Lv2+      | Care Lv3+      | Care Lv4+      | Care Lv5       |
|-------------------------------|------|-------------------|----------------|----------------|----------------|----------------|----------------|
|                               | n    | Mean (SD)         | Mean (SD)      | Mean (SD)      | Mean (SD)      | Mean (SD)      | Mean (SD)      |
| <b>Hobby activities group</b> |      |                   |                |                |                |                |                |
| Never                         | 2833 | 14.1 (25.8)       | 9.8 (21.4)     | 7.1 (17.6)     | 4.0 (12.5)     | 2.2 (8.5)      | 0.8 (4.6)      |
| A few times a year            | 259  | 9.0 (19.4)        | 5.6 (15.7)     | 3.5 (9.9)      | 1.8 (6.4)      | 1.2 (5.3)      | 0.6 (4.1)      |
| Once or twice a month         | 524  | 10.7 (21.8)       | 6.1 (16.6)     | 4.6 (14.4)     | 2.7 (10.2)     | 1.6 (7.5)      | 0.6 (3.7)      |
| Once a week +                 | 972  | 10.6 (21.8)       | 6.2 (16.6)     | 4.1 (13.2)     | 2.2 (9.3)      | 1.0 (6.0)      | 0.4 (3.0)      |
|                               |      | <i>p</i> <.001    | <i>p</i> <.001 | <i>p</i> <.001 | <i>p</i> <.001 | <i>p</i> =.019 | <i>p</i> =.026 |
| <b>Sports group or club</b>   |      |                   |                |                |                |                |                |
| Never                         | 3716 | 13.7 (25.1)       | 9.3 (20.7)     | 6.6 (17.0)     | 3.8 (12.1)     | 2.1 (8.4)      | 0.8 (4.6)      |
| A few times a year            | 91   | 7.5 (19.6)        | 5.6 (18.4)     | 4.8 (16.5)     | 2.8 (12.0)     | 1.2 (5.5)      | 0.8 (5.0)      |
| Once or twice a month         | 125  | 6.0 (17.3)        | 3.3 (13.4)     | 2.7 (12.5)     | 1.4 (6.9)      | 0.5 (2.6)      | 0.2 (1.4)      |
| Once a week +                 | 572  | 7.2 (18.1)        | 3.8 (12.8)     | 2.4 (9.8)      | 1.0 (5.4)      | 0.5 (3.4)      | 0.1 (1.0)      |
|                               |      | <i>p</i> <.001    | <i>p</i> <.001 | <i>p</i> <.001 | <i>p</i> <.001 | <i>p</i> <.001 | <i>p</i> =.005 |
| <b>Volunteer group</b>        |      |                   |                |                |                |                |                |
| Never                         | 3899 | 12.9 (24.4)       | 8.6 (20.0)     | 6.1 (16.4)     | 3.5 (11.6)     | 1.9 (7.9)      | 0.7 (4.3)      |
| A few times a year            | 194  | 7.1 (17.3)        | 3.9 (12.8)     | 2.9 (11.1)     | 1.6 (8.3)      | 1.1 (7.7)      | 0.7 (5.6)      |
| Once or twice a month         | 193  | 9.9 (21.6)        | 6.1 (17.0)     | 4.3 (13.3)     | 2.0 (8.9)      | 1.1 (7.2)      | 0.4 (2.7)      |
| Once a week +                 | 122  | 6.4 (17.5)        | 3.9 (12.4)     | 3.1 (10.9)     | 1.6 (6.9)      | 0.8 (3.2)      | 0.2 (1.5)      |
|                               |      | <i>p</i> <.001    | <i>p</i> <.001 | <i>p</i> <.001 | <i>p</i> <.001 | <i>p</i> =.019 | <i>p</i> =.165 |

Unit: month SD: Standard deviation

a) This is including certification for long-term care level from support level 1 to care level 5.



**Tab.3 Differences of cumulative cost in LTCI services in a 11-years follow-up period by social participation**

|                               | n    | Mean | Mortality                               |                                                    |      |
|-------------------------------|------|------|-----------------------------------------|----------------------------------------------------|------|
|                               |      |      | OLS <sup>a,b)</sup><br>Coef.<br>(95%CI) | IPW with<br>MI <sup>c,d)</sup><br>Coef.<br>(95%CI) |      |
| <b>Hobby activities group</b> |      |      |                                         |                                                    |      |
| Never                         | 2833 | 14.6 | <i>ref.</i>                             | <i>ref.</i>                                        | 30.8 |
| A few times a year            | 259  | 6.6  | - 3.2†<br>(-6.7 to 0.2)                 | - 3.5<br>(-8.1 to 1.2)                             | 28.0 |
| Once or twice a month         | 524  | 10.2 | - 2.8†<br>(-5.8 to 0.7)                 | - 2.2<br>(-5.6 to 1.2)                             | 21.7 |
| Once a week +                 | 972  | 9.4  | - 3.6**<br>(-6.0 to -1.3)               | - 3.5*<br>(-6.2 to -0.8)                           | 19.5 |
| <b>Sports group or club</b>   |      |      |                                         |                                                    |      |
| Never                         | 3716 | 13.9 | <i>ref.</i>                             | <i>ref.</i>                                        | 29.1 |
| A few times a year            | 91   | 9.3  | 2.5<br>(-4.9 to 9.9)                    | 1.8<br>(-5.8 to 9.4)                               | 18.7 |
| Once or twice a month         | 125  | 4.8  | - 3.3<br>(-7.6 to 9.4)                  | - 4.2<br>(-10.7 to 2.3)                            | 16.1 |
| Once a week +                 | 572  | 5.2  | - 4.9***<br>(-6.9 to -2.8)              | - 6.1***<br>(-9.3 to -2.8)                         | 18.6 |
| <b>Volunteer group</b>        |      |      |                                         |                                                    |      |
| Never                         | 3899 | 12.7 | <i>ref.</i>                             | <i>ref.</i>                                        | 28.4 |
| A few times a year            | 194  | 4.8  | - 4.1**<br>(-7.1 to -1.0)               | - 3.9<br>(-9.1 to 1.3)                             | 20.7 |
| Once or twice a month         | 193  | 10.0 | 1.9<br>(-2.9 to 6.7)                    | 1.5<br>(-3.8 to 6.7)                               | 12.7 |
| Once a week +                 | 122  | 5.9  | - 0.7<br>(-4.5 to 3.1)                  | - 1.4<br>(-7.9 to 5.1)                             | 11.5 |

\*\*\* p<.001 \*\* p<.01 \* p<.05 † p<.10 Unit: 1000USD

OLS: Ordinal least squares, IPW: Inverse probability weighting, MI: Multiple imputation, CI: Confidential interval

a) Missing values in control variables were included as a dummy variable.

b) The result was controlled by sex, age, disease and/or impairment, years of education, equivalent income, marital status, living situation, self rated health at baseline.

c) Multiple imputation by chained equations was performed using sex, age, disease and/or impairment, years of education, equivalent income, marital status, living situation, self rated health at baseline (m=20).

d) The generalized propensity scores were calculated using multinomial regression analysis using all previously listed potential confounders: sex, age, disease and/or impairment, years of education, equivalent income, marital status, living situation, self rated health.



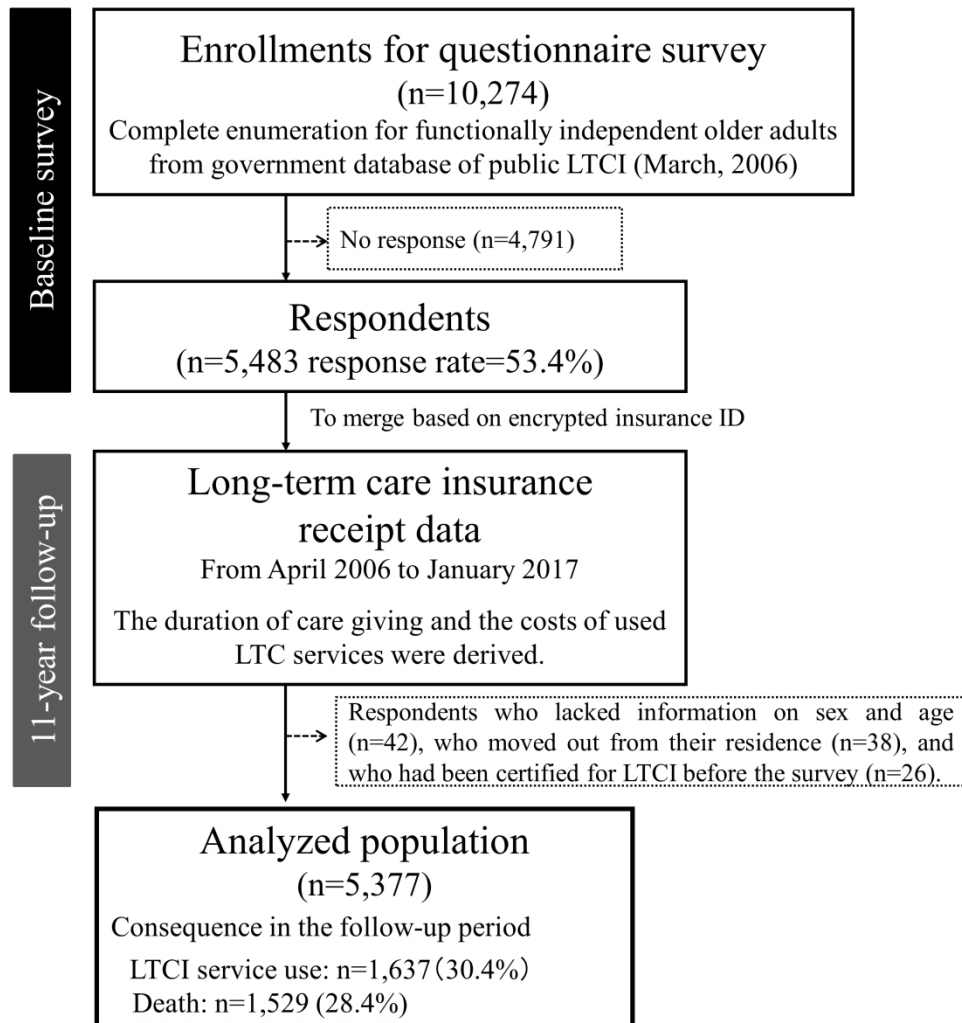

Figure 1: Flow chart of respondent selection.

242x261mm (300 x 300 DPI)

**Table S1. Differences of cumulative cost in LTCI services by OLS with MI, and GLM**

|                               | n    | GLM <sup>a,b)</sup>         | OLS with MI <sup>b,c)</sup> |
|-------------------------------|------|-----------------------------|-----------------------------|
|                               |      | Marginal effect<br>(95%CI)  | Coef.<br>(95%CI)            |
| <b>Hobby activities group</b> |      |                             |                             |
| Never                         | 2833 |                             | <i>ref.</i>                 |
| A few times a year            | 259  | - 1.9<br>(-11.0 to 7.2)     | - 3.1†<br>(-6.6 to 0.3)     |
| Once or twice a month         | 524  | - 3.3<br>(-8.7 to 2.2)      | - 2.9†<br>(-5.8 to 0.1)     |
| Once a week +                 | 972  | - 3.5†<br>(-7.3 to 0.3)     | - 3.7*<br>(-6.0 to -1.3)    |
| <b>Sports group or club</b>   |      |                             |                             |
| Never                         | 3716 |                             | <i>ref.</i>                 |
| A few times a year            | 91   | 10.9<br>(-14.3 to 36.1)     | 2.7<br>(-4.6 to 10.0)       |
| Once or twice a month         | 125  | - 5.0<br>(-17.8 to 7.9)     | - 3.5<br>(-7.8 to 0.7)      |
| Once a week +                 | 572  | - 7.0**<br>(-11.2 to -2.9)  | - 4.9***<br>(-6.9 to -2.9)  |
| <b>Volunteer group</b>        |      |                             |                             |
| Never                         | 3899 |                             | <i>ref.</i>                 |
| A few times a year            | 194  | - 9.4***<br>(-14.1 to -4.6) | - 4.3**<br>(-7.3 to -1.2)   |
| Once or twice a month         | 193  | 2.3<br>(-8.9 to 13.6)       | 1.9<br>(-2.9 to 6.8)        |
| Once a week +                 | 122  | - 2.8<br>(-11.1 to 5.6)     | - 0.5<br>(-4.4 to 3.3)      |

\*\*\* p<.001 \*\* p<.01 \* p<.05 † p<.10 Unit: 1000 USD

GLM: Generalized linear model, OLS: Ordinal least squares, MI: Multiple imputation, CI: Confidential interval

a) Missing values in control variables were included as a dummy variable.

b) Each model was controlled by sex, age, disease and/or impairment, years of education, equivalent income, marital status, living situation, self rated health at baseline.

c) Multiple imputation by chained equations was performed using sex, age, disease and/or impairment, years of education, equivalent income, marital status, living situation, self rated health at baseline (m=20).

**Table S2. C statistics by multinomial regression model**

|                                | Hobby activi-<br>ties group | Sports group<br>or club | Volunteer<br>group |
|--------------------------------|-----------------------------|-------------------------|--------------------|
| A few times a year vs Never    | 0.664                       | 0.757                   | 0.637              |
| Once or twice a month vs Never | 0.665                       | 0.695                   | 0.681              |
| Once a week + vs Never         | 0.662                       | 0.645                   | 0.713              |

C statistics by multinomial regression model in order to calculate generalized propensity scores were not high: hobby activities group=.662 to .665, sports group or club=.645 to .757, volunteer group=.637 to 713. However, it is not necessarily to mean undesirable model, because the goal of a propensity score model is to efficiently control confounding, not to predict treatment or exposure.<sup>28</sup>

For peer review only

**Table S3. Differences of lifetime cost in LTCI services by social participation among deceased person**

|                               | n    | Mean | OLS <sup>a,b)</sup>         | GLM <sup>a,b)</sup>           | After Multiple Imputation <sup>c)</sup> |                                       |
|-------------------------------|------|------|-----------------------------|-------------------------------|-----------------------------------------|---------------------------------------|
|                               |      |      | Coef.<br>(95%CI)            | Marginal effect<br>(95%CI)    | OLS <sup>b)</sup><br>Coef.<br>(95%CI)   | IPW <sup>d)</sup><br>Coef.<br>(95%CI) |
| <b>Hobby activities group</b> |      |      |                             |                               |                                         |                                       |
| Never                         | 861  | 19.2 | <i>ref.</i>                 |                               | <i>ref.</i>                             | <i>ref.</i>                           |
| A few times a year            | 72   | 9.7  | - 6.0*<br>(-11.9 to - 0.1)  | - 5.6<br>(-14.9 to 3.8)       | - 5.6†<br>(-11.6 to 0.3)                | - 4.7<br>(-13.7 to 4.4)               |
| Once or twice a month         | 113  | 15.8 | - 2.0<br>(-9.1 to 5.1)      | - 0.9<br>(-9.3 to 7.6)        | - 2.1<br>(-9.2 to 4.9)                  | - 2.4<br>(-9.8 to 4.9)                |
| Once a week +                 | 188  | 12.2 | - 5.3*<br>(-10.1 to -0.4)   | - 3.9<br>(-7.3 to 0.3)        | - 5.4*<br>(-10.2 to -0.5)               | - 5.7†<br>(-11.6 to 0.3)              |
| <b>Sports group or club</b>   |      |      |                             |                               |                                         |                                       |
| Never                         | 1066 | 19.1 | <i>ref.</i>                 |                               | <i>ref.</i>                             | <i>ref.</i>                           |
| A few times a year            | 17   | 4.3  | - 8.9***<br>(-13.7 to -4.1) | - 17.8***<br>(-22.8 to -12.8) | - 8.6**<br>(-14.1 to -3.0)              | - 9.4<br>(-27.3 to 8.4)               |
| Once or twice a month         | 20   | 4.0  | - 8.6**<br>(-14.8 to -2.4)  | - 18.5***<br>(-24.0 to -13.0) | - 9.1**<br>(-15.3 to -2.8)              | - 10.1<br>(-26.6 to 6.4)              |
| Once a week +                 | 105  | 5.4  | - 9.7***<br>(-13.8 to -5.7) | - 11.4**<br>(-17.8 to -4.9)   | - 9.4***<br>(-13.4 to -5.4)             | - 11.1**<br>(-18.6 to -3.5)           |
| <b>Volunteer group</b>        |      |      |                             |                               |                                         |                                       |
| Never                         | 1091 | 16.9 | <i>ref.</i>                 |                               | <i>ref.</i>                             | <i>ref.</i>                           |
| A few times a year            | 40   | 11.2 | - 1.8<br>(-12.4 to 8.8)     | - 5.9<br>(-18.8 to 7.0)       | - 1.7<br>(-12.6 to 9.2)                 | - 2.0<br>(-13.7 to 9.8)               |
| Once or twice a month         | 24   | 20.6 | 6.2<br>(-14.9 to 27.2)      | 10.2<br>(-22.5 to 42.9)       | 7.1<br>(-13.9 to 28.0)                  | 7.6<br>(-7.4 to 22.7)                 |
| Once a week +                 | 14   | 9.3  | - 4.6<br>(-16.8 to 7.7)     | - 12.5**<br>(-20.4 to -4.7)   | - 5.1<br>(-18.1 to 7.8)                 | - 3.4<br>(-23.0 to 16.2)              |

\*\*\* p<.001 \*\* p<.01 \* p<.05 † p<.10 Unit: 1000USD

OLS: Ordinal least squares, GLM: Generalized linear model, IPW: Inverse probability weighting, CI: Confidential interval

a) Missing values in control variables were included as a dummy variable.

b) Each model was controlled by sex, age, disease and/or impairment, years of education, equivalent income, marital status, living situation, self rated health at baseline.

c) Multiple imputation by chained equations was performed using sex, age, disease and/or impairment, years of education, equivalent income, marital status, living situation, self rated health at baseline (m=20).

d) The generalized propensity scores were calculated using multinomial regression analysis using all previously listed potential confounders: sex, age, disease and/or impairment, years of education, equivalent income, marital status, living situation, self rated health. C statistics were as follows: hobby activities group=.640 to .665, sports group or club=.645 to .757, volunteer group=.637 to .713.

# Reporting checklist for cohort study.

Based on the STROBE cohort guidelines.

## Instructions to authors

Complete this checklist by entering the page numbers from your manuscript where readers will find each of the items listed below.

Your article may not currently address all the items on the checklist. Please modify your text to include the missing information. If you are certain that an item does not apply, please write "n/a" and provide a short explanation.

Upload your completed checklist as an extra file when you submit to a journal.

In your methods section, say that you used the STROBE cohort reporting guidelines, and cite them as:

von Elm E, Altman DG, Egger M, Pocock SJ, Gotsche PC, Vandenbroucke JP. The Strengthening the Reporting of Observational Studies in Epidemiology (STROBE) Statement: guidelines for reporting observational studies.

|                        |     | Reporting Item                                                                                                                  | Page Number |
|------------------------|-----|---------------------------------------------------------------------------------------------------------------------------------|-------------|
| Title                  | #1a | Indicate the study's design with a commonly used term in the title or the abstract                                              | 1           |
| Abstract               | #1b | Provide in the abstract an informative and balanced summary of what was done and what was found                                 | 2           |
| Background / rationale | #2  | Explain the scientific background and rationale for the investigation being reported                                            | 4           |
| Objectives             | #3  | State specific objectives, including any prespecified hypotheses                                                                | 5           |
| Study design           | #4  | Present key elements of study design early in the paper                                                                         | 6           |
| Setting                | #5  | Describe the setting, locations, and relevant dates, including periods of recruitment, exposure, follow-up, and data collection | 6           |
| Eligibility criteria   | #6a | Give the eligibility criteria, and the sources and methods of selection of participants. Describe methods of follow-up.         | 6           |

|    |                  |      |                                                                   |     |
|----|------------------|------|-------------------------------------------------------------------|-----|
| 1  |                  | #6b  | For matched studies, give matching criteria and number of         | n/a |
| 2  |                  |      | exposed and unexposed                                             |     |
| 3  |                  |      |                                                                   |     |
| 4  | Variables        | #7   | Clearly define all outcomes, exposures, predictors, potential     | 6-8 |
| 5  |                  |      | confounders, and effect modifiers. Give diagnostic criteria, if   |     |
| 6  |                  |      | applicable                                                        |     |
| 7  |                  |      |                                                                   |     |
| 8  |                  |      |                                                                   |     |
| 9  |                  |      |                                                                   |     |
| 10 | Data sources /   | #8   | For each variable of interest give sources of data and details of | 6   |
| 11 | measurement      |      | methods of assessment (measurement). Describe                     |     |
| 12 |                  |      | comparability of assessment methods if there is more than one     |     |
| 13 |                  |      | group. Give information separately for for exposed and            |     |
| 14 |                  |      | unexposed groups if applicable.                                   |     |
| 15 |                  |      |                                                                   |     |
| 16 |                  |      |                                                                   |     |
| 17 |                  |      |                                                                   |     |
| 18 | Bias             | #9   | Describe any efforts to address potential sources of bias         | 13  |
| 19 |                  |      |                                                                   |     |
| 20 | Study size       | #10  | Explain how the study size was arrived at                         | 6   |
| 21 |                  |      |                                                                   |     |
| 22 |                  |      |                                                                   |     |
| 23 | Quantitative     | #11  | Explain how quantitative variables were handled in the            | 6-8 |
| 24 | variables        |      | analyses. If applicable, describe which groupings were chosen,    |     |
| 25 |                  |      | and why                                                           |     |
| 26 |                  |      |                                                                   |     |
| 27 |                  |      |                                                                   |     |
| 28 | Statistical      | #12a | Describe all statistical methods, including those used to control | 8   |
| 29 | methods          |      | for confounding                                                   |     |
| 30 |                  |      |                                                                   |     |
| 31 |                  |      |                                                                   |     |
| 32 |                  | #12b | Describe any methods used to examine subgroups and                | 8   |
| 33 |                  |      | interactions                                                      |     |
| 34 |                  |      |                                                                   |     |
| 35 |                  |      |                                                                   |     |
| 36 |                  | #12c | Explain how missing data were addressed                           | 8   |
| 37 |                  |      |                                                                   |     |
| 38 |                  | #12d | If applicable, explain how loss to follow-up was addressed        | 6   |
| 39 |                  |      |                                                                   |     |
| 40 |                  |      |                                                                   |     |
| 41 |                  | #12e | Describe any sensitivity analyses                                 | 8   |
| 42 |                  |      |                                                                   |     |
| 43 | Participants     | #13a | Report numbers of individuals at each stage of study—eg           | 6   |
| 44 |                  |      | numbers potentially eligible, examined for eligibility, confirmed |     |
| 45 |                  |      | eligible, included in the study, completing follow-up, and        |     |
| 46 |                  |      | analysed. Give information separately for for exposed and         |     |
| 47 |                  |      | unexposed groups if applicable.                                   |     |
| 48 |                  |      |                                                                   |     |
| 49 |                  |      |                                                                   |     |
| 50 |                  |      |                                                                   |     |
| 51 |                  | #13b | Give reasons for non-participation at each stage                  | 6   |
| 52 |                  |      |                                                                   |     |
| 53 |                  | #13c | Consider use of a flow diagram                                    | 6   |
| 54 |                  |      |                                                                   |     |
| 55 |                  |      |                                                                   |     |
| 56 | Descriptive data | #14a | Give characteristics of study participants (eg demographic,       | 10  |
| 57 |                  |      | clinical, social) and information on exposures and potential      |     |
| 58 |                  |      |                                                                   |     |
| 59 |                  |      |                                                                   |     |
| 60 |                  |      |                                                                   |     |

|    |                  |                                                                        |       |
|----|------------------|------------------------------------------------------------------------|-------|
| 1  |                  | confounders. Give information separately for exposed and               |       |
| 2  |                  | unexposed groups if applicable.                                        |       |
| 3  |                  |                                                                        |       |
| 4  |                  | #14b Indicate number of participants with missing data for each        | 6     |
| 5  |                  | variable of interest                                                   |       |
| 6  |                  |                                                                        |       |
| 7  |                  | #14c Summarise follow-up time (eg, average and total amount)           | 6     |
| 8  |                  |                                                                        |       |
| 9  |                  |                                                                        |       |
| 10 | Outcome data     | #15 Report numbers of outcome events or summary measures               | N/A   |
| 11 |                  | over time. Give information separately for exposed and                 |       |
| 12 |                  | unexposed groups if applicable.                                        |       |
| 13 |                  |                                                                        |       |
| 14 |                  |                                                                        |       |
| 15 | Main results     | #16a Give unadjusted estimates and, if applicable, confounder-         | 10    |
| 16 |                  | adjusted estimates and their precision (eg, 95% confidence             |       |
| 17 |                  | interval). Make clear which confounders were adjusted for and          |       |
| 18 |                  | why they were included                                                 |       |
| 19 |                  |                                                                        |       |
| 20 |                  |                                                                        |       |
| 21 |                  |                                                                        |       |
| 22 |                  | #16b Report category boundaries when continuous variables were         | N/A   |
| 23 |                  | categorized                                                            |       |
| 24 |                  |                                                                        |       |
| 25 |                  |                                                                        |       |
| 26 |                  | #16c If relevant, consider translating estimates of relative risk into | N/A   |
| 27 |                  | absolute risk for a meaningful time period                             |       |
| 28 |                  |                                                                        |       |
| 29 |                  |                                                                        |       |
| 30 | Other analyses   | #17 Report other analyses done—e.g., analyses of subgroups and         | 10    |
| 31 |                  | interactions, and sensitivity analyses                                 |       |
| 32 |                  |                                                                        |       |
| 33 |                  |                                                                        |       |
| 34 | Key results      | #18 Summarise key results with reference to study objectives           | 12    |
| 35 |                  |                                                                        |       |
| 36 | Limitations      | #19 Discuss limitations of the study, taking into account sources of   | 13    |
| 37 |                  | potential bias or imprecision. Discuss both direction and              |       |
| 38 |                  | magnitude of any potential bias.                                       |       |
| 39 |                  |                                                                        |       |
| 40 |                  |                                                                        |       |
| 41 | Interpretation   | #20 Give a cautious overall interpretation considering objectives,     | 12-13 |
| 42 |                  | limitations, multiplicity of analyses, results from similar studies,   |       |
| 43 |                  | and other relevant evidence.                                           |       |
| 44 |                  |                                                                        |       |
| 45 |                  |                                                                        |       |
| 46 | Generalisability | #21 Discuss the generalisability (external validity) of the study      | 13    |
| 47 |                  | results                                                                |       |
| 48 |                  |                                                                        |       |
| 49 |                  |                                                                        |       |
| 50 | Funding          | #22 Give the source of funding and the role of the funders for the     | 14    |
| 51 |                  | present study and, if applicable, for the original study on which      |       |
| 52 |                  | the present article is based                                           |       |
| 53 |                  |                                                                        |       |
| 54 |                  |                                                                        |       |
| 55 |                  |                                                                        |       |

The STROBE checklist is distributed under the terms of the Creative Commons Attribution License CC-BY. This checklist was completed on 25. May 2018 using <http://www.goodreports.org/>, a tool made by the [EQUATOR Network](#) in collaboration with [Penelope.ai](#)

# BMJ Open

## Reduced long-term care cost by social participation among older Japanese adult: A prospective follow-up study in JAGES

|                                 |                                                                                                                                                                                                                                                                                                                                                                                                                                                                                                                                                                                                                                                                                                                                                                                                                                                                                                          |
|---------------------------------|----------------------------------------------------------------------------------------------------------------------------------------------------------------------------------------------------------------------------------------------------------------------------------------------------------------------------------------------------------------------------------------------------------------------------------------------------------------------------------------------------------------------------------------------------------------------------------------------------------------------------------------------------------------------------------------------------------------------------------------------------------------------------------------------------------------------------------------------------------------------------------------------------------|
| Journal:                        | <i>BMJ Open</i>                                                                                                                                                                                                                                                                                                                                                                                                                                                                                                                                                                                                                                                                                                                                                                                                                                                                                          |
| Manuscript ID                   | bmjopen-2018-024439.R2                                                                                                                                                                                                                                                                                                                                                                                                                                                                                                                                                                                                                                                                                                                                                                                                                                                                                   |
| Article Type:                   | Research                                                                                                                                                                                                                                                                                                                                                                                                                                                                                                                                                                                                                                                                                                                                                                                                                                                                                                 |
| Date Submitted by the Author:   | 29-Jan-2019                                                                                                                                                                                                                                                                                                                                                                                                                                                                                                                                                                                                                                                                                                                                                                                                                                                                                              |
| Complete List of Authors:       | Saito, Masashige; Nihon Fukushi University, Faculty of Social Welfare; Nihon Fukushi University, Center for Well-being and Society<br>Aida, Jun; Tohoku University Graduate School of Dentistry, International and Community Oral Health<br>kondo, naoki; University of Tokyo School of Public Health, Department of Health Economics and Epidemiology Research<br>Saito, Junko; University of Tokyo School of Public Health, Department of Health Economics and Epidemiology Research<br>Kato, Hiroataka; Keio University Graduate School of Business Administration<br>Ota, Yasuhiro; QOL 84 Plus Inc.<br>Amemiya, Airi; University of Tokyo School of Public Health, Department of Health Economics and Epidemiology Research<br>Kondo, Katsunori; Chiba University, Center for Preventive Medical Science; National Center for Geriatrics and Gerontology, Center for Gerontology and Social Science |
| <b>Primary Subject Heading</b>: | Public health                                                                                                                                                                                                                                                                                                                                                                                                                                                                                                                                                                                                                                                                                                                                                                                                                                                                                            |
| Secondary Subject Heading:      | Health services research, Health policy, Epidemiology                                                                                                                                                                                                                                                                                                                                                                                                                                                                                                                                                                                                                                                                                                                                                                                                                                                    |
| Keywords:                       | Long-term care, cumulative cost, social participation, older adults, cost containment                                                                                                                                                                                                                                                                                                                                                                                                                                                                                                                                                                                                                                                                                                                                                                                                                    |
|                                 |                                                                                                                                                                                                                                                                                                                                                                                                                                                                                                                                                                                                                                                                                                                                                                                                                                                                                                          |

SCHOLARONE™  
Manuscripts



1  
2  
3  
4 **Title:** Reduced long-term care cost by social participation among older  
5 Japanese adult: A prospective follow-up study in JAGES  
6  
7  
8  
9

10 **Author names and affiliations:**

11 Masashige Saito<sup>1,2</sup>, Jun Aida<sup>3</sup>, Naoki Kondo<sup>4</sup>, Junko Saito<sup>4</sup>, Hirotaka Kato<sup>5</sup>, Yasuhiro  
12 Ota<sup>6</sup>, Airi Amemiya<sup>4</sup>, Katsunori Kondo<sup>2,7,8</sup>  
13  
14  
15

16  
17 <sup>1</sup> Faculty of Social Welfare, Nihon Fukushi University, Aichi, Japan.

18 <sup>2</sup> Center for Well-being and Society, Nihon Fukushi University, Aichi, Japan.

19 <sup>3</sup> Department of International and Community Oral Health, Tohoku University Graduate School of  
20 Dentistry, Miyagi, Japan  
21

22 <sup>4</sup> Department of Health and Social Behavior, Department of Health Education and Health Sociology,  
23 School of Public Health, The University of Tokyo, Tokyo, Japan  
24

25 <sup>5</sup> Graduate School of Business Administration, Keio University, Kanagawa, Japan  
26

27 <sup>6</sup> QOL 84 Plus Inc., Aichi, Japan  
28

29 <sup>7</sup> Center for Preventive Medical Sciences, Chiba University, Chiba, Japan  
30

31 <sup>8</sup> Center for Gerontology and Social Science, National Center for Geriatrics and Gerontology, Aichi,  
32 Japan  
33  
34  
35

36  
37 **Corresponding author:** Masashige Saito

38 Faculty of Social Welfare, Nihon Fukushi University, Aichi, Japan

39 Okuda, Mihama-cho, Chita-gun, Aichi 470-3295, Japan

40 E-mail: masa-s@n-fukushi.ac.jp  
41  
42  
43  
44  
45

46 **Keywords:** Long-term care, cumulative cost, social participation, older adults, cost  
47 containment  
48  
49

50  
51 **Word counts:** 2,784 words  
52  
53

54 **Short Title:** Long-term care costs and social participation  
55  
56

57 **Number of Tables, Figures, and Supplementary Materials:**

58 3 tables; 1 figure; 1 supplementary materials  
59  
60

## Abstract

**Objectives:** Reducing costs related to functional disabilities and long-term care (LTC) is necessary in aging societies. We evaluated the differences in the cumulative cost of public long-term care insurance (LTCI) services by social participation.

**Design:** Prospective observational study.

**Setting:** Our baseline survey was conducted in March 2006 among people aged 65 or older who were not eligible for public LTCI benefits were selected using a complete enumeration in Tokoname City, Japan. We followed up with their LTC services costs over a period of 11 years. Social participation was assessed by the frequency of participation in clubs for hobbies, sports, or volunteering. We adopted a classical linear regression analysis and an inverse probability weighting (IPW), with multiple imputation of missing values

**Participants:** Functionally independent 5,377 older adults.

**Primary outcome measures:** The cumulative cost of public LTCI services for 11 years.

**Results:** Even when adjusting for the confounding variables, social participation at the baseline was negatively associated with the cumulative cost of LTCI services. The IPW model showed that respondents who participated in hobby activities once a week or more, the cumulative cost of LTCI services for 11 years was lower approximately 3,500 USD per person, in comparison to non-participants. Similarly, that in respondents who participated in sports group or clubs was lower approximately 6,000 USD than non-participants.

**Conclusions:** Older adults' participation in community organizations may help reduce future LTC costs. Promoting participation opportunities in the community could ensure the financial stability of LTCI services.

## Strengths and limitations of this study

- To our knowledge, this is the first to demonstrate that social participations among older adults might help lower subsequent LTCI costs.
- Our findings are based on eleven-years prospective observational study using public LTCI receipt data in Japan.
- Selection bias might have occurred because of the 53% response rate to the baseline survey.
- The measurements of social participation rely on self-reported questionnaire.

## 1 **Main text**

### 2 **Introduction**

3 Across the globe, costs related to functional disabilities and long-term care (LTC) are  
4 rapidly increasing in societies with aging populations. Expenses are greater among those  
5 with more severe impairments.<sup>1</sup> In Japan, one of the countries experiencing the highest  
6 rate of aging, the proportion of older people is currently 27.3% and is predicted to reach  
7 around 40% by 2065.<sup>2</sup> Under these circumstances, the costs for long-term care insurance  
8 (LTCI) are expected to rise from 100 billion USD in 2016 to 210 billion USD by 2025.  
9 Lowering these costs requires building a sustainable and healthy aging society which  
10 means developing and maintaining the functional ability that enables well-being in older  
11 age. The Japanese government implemented a public nursing care insurance law that  
12 includes an LTC prevention policy.<sup>3</sup> For this policy, a population approach as primary  
13 prevention was proposed rather than a high-risk one which was grounded in risk  
14 screening based on intervention targeting. Promoting social participation is considered  
15 an effective intervention regarding the population approach, which focuses on the entire  
16 group of older adults in a community.

17 Although social participation is an ambiguous concept, Bukov (2002) distinguished  
18 three types of participation: collective, productive, and political.<sup>4</sup> In this paper, we  
19 focused on involvement in collective activities in formal and informal societal groups at  
20 local community. Social participation helps maintain social networks, support, and roles,  
21 raises self-esteem and self-efficacy, and facilitates access to various kinds of information.  
22 Several international systematic reviews and meta-analyses have reported on the  
23 physical, psychological, and social benefits of social participation among older people.<sup>5-</sup>  
24 <sup>10</sup> For instance, meta-analysis across 148 articles mentioned active engagement in social  
25 activities could reduce risk for mortality. In particular, previous observational studies in  
26 Japan also found that collective social participation activities such as volunteering,  
27 sports clubs, and hobbies among older adults lowered the risk of developing depressive  
28 symptoms,<sup>11-13</sup> the incidence of functional disabilities,<sup>14-16</sup> cognitive decline or  
29 dementia,<sup>17,18</sup> falls,<sup>19</sup> and immature death.<sup>20-23</sup>

30 We hypothesize that if social participation extends healthy life expectancy and reduces

1  
2  
3  
4  
5  
6  
7  
8  
9  
10  
11  
12  
13  
14  
15  
16  
17  
18  
19  
20  
21  
22  
23  
24  
25  
26  
27  
28  
29  
30  
31  
32  
33  
34  
35  
36  
37  
38  
39  
40  
41  
42  
43  
44  
45  
46  
47  
48  
49  
50  
51  
52  
53  
54  
55  
56  
57  
58  
59  
60

1 the time spent in intensive nursing care, then the cumulative cost of LTCI services might  
2 be lower among the participants; however, to our knowledge, there is no evidence that  
3 social participation lessens it. In addition, Japanese LTCI services are provided mainly  
4 when people aged 65 and over come to require care or support, based on investigation  
5 for certification and doctor's written opinion. The cost of LTCI services is one of the  
6 most important issues for the public sector as an insurer. The evidence for contributing  
7 to cost-saving has been useful for recent intervention financing schemes that provide  
8 economic incentives to service providers; for instance, social impact bonds (SIBs). In  
9 this paper, using data from a follow-up study that took place over a period of 11 years  
10 and tracked older Japanese adults, we assessed the differences of the duration period of  
11 requiring care level and of the cumulative cost of LTCI services by frequency of social  
12 participation in baseline survey.

13

## 1 **Methods**

### 2 ***Study design***

3 The Japan Gerontological Evaluation Study (JAGES) conducted a self-administered  
4 questionnaire in March 2006 as a baseline; 5,483 respondents who were 65 years or  
5 older, physically and cognitively independent, and not eligible for public LTCI benefits  
6 were selected using a complete enumeration; they live in the city of Tokoname in Aichi  
7 Prefecture (response rate=53.4%: 5,483 / 10,274). In addition, our subjects were more  
8 healthy or active older adults at baseline, because Japanese LTCI certifies the people  
9 included mild care needs, not only severe care level. Afterward, we obtained receipt data  
10 on LTCI benefits over a period of 11 years after the baseline survey, from government  
11 database of public LTCI. After eliminating respondents who lacked information on sex  
12 and age (n=42), who had moved out of their residence (n=38), and who had been  
13 certified for LTCI before the baseline survey (n=26), 5,377 respondents were linked to  
14 the LTCI receipt dataset (**Figure 1**).

### 15 ***Measurements***

#### 16 **Outcome variables; the costs of LTCI services**

17 Primary outcome variable is the cumulative cost of LTCI services at follow-up period.  
18 We obtained the LTC costs of insured services across forty-four points every three  
19 months (April, July, October, January) over a period of 11 years. We summed them up  
20 after tripling these monthly costs in order to calculate an approximate value of the overall  
21 cost for the follow-up period. We used the currency exchange rate of 100JPY to 1USD.  
22 As closely related variable, we calculated the number of months which was eligible for  
23 LTCI benefit across the whole population, from care level 5 which signifies the highest  
24 level of requirement for LTC to any care or support level.

25 In addition, Japanese LTCI operates based on social insurance principles. Only services  
26 are provided, not cash allowances, and recipients can choose their services and  
27 providers.<sup>24</sup> The receipt data includes information about using insured services such as  
28 home visits, day, short-stay, residential, or in-facility services. The data do not include  
29 costs, which are not covered by insurance (such as food, housing, and diaper expenses).  
30

1  
2  
3  
4  
5 1 In general, 10% of these costs are co-payments (the municipality, which acts as an  
6 2 insurer, pays 90%), although there is a upper limit to the amount of monthly insurance  
7 3 benefits, which differs depending on the needed level of care. People with certifications  
8 4 for LTC and who need (levels 1 to 5) or require support (levels 1 or 2) can use LTCI  
9 5 services. Those higher levels of care can utilize more LTCI services through insurance  
10 6 coverage. The cumulative cost of such care in the following cases is zero: deceased  
11 7 individuals who did not have functional disabilities, respondents who did not have  
12 8 proper certification, and non-service users.

### 9 **Explanatory variables: Social participation**

10 As mentioned above, social participation is an ambiguous concept. The indicator of  
11 11 social participation was taken from the Japanese General Social Survey,<sup>25</sup> and  
12 12 categorized organizations into following eight types as collective social participation  
13 13 activities: hobby activities group, sports group or club, volunteer group, neighborhood  
14 14 association, senior citizen club/fire-fighting team, religious group, political organization  
15 15 or group, industrial or trade association, and citizen or consumer group. We focused on  
16 16 the three groups/organizations previously identified as being associated with lower risks  
17 17 for functional disabilities; hobby activities group,<sup>17,26</sup> sports group or club,<sup>15,26</sup> and  
18 18 volunteer group.<sup>27,28</sup> According to principal components analysis, these community  
19 19 activities were categorized to horizontal organizations.<sup>29,30</sup> Respondents were asked how  
20 20 often they took part in these activities. We categorized them to the four frequencies,  
21 21 respectively; *never*; *a few times a year*; *once or twice a month*; and *once a week or more*.

### 22 **Covariates**

23 Demographic variables included sex, age, educational attainment, equivalent income  
24 24 (USD), marital status, and living situation at the baseline survey. It is well known that  
25 25 these are basic variables as social determinants of health. Age was a continuous variable  
26 26 ( $73.4\pm 6.2$ ). Years of education was categorized as *<6*, *6-9*, *10-12*, and *13+*. We  
27 27 equalized household income by the square root of the numbers and classified it as *<20.0*,  
28 28 *20.0-39.9*, and *40.0+* thousand USD. Marital status consisted of *married*, *widowed*,  
29 29 *divorced*, and *never married*. Living situation was categorized as *living alone*, *with one's*  
30 30 *spouse only*, *with a child*, or *with others* such as grandchildren, siblings, and relatives.

1  
2  
3  
4  
5 1 In order to account for the health status at the baseline, the presence of disease or  
6 2 impairment and self-rated health were considered. The presence of disease or  
7 3 impairment was based on self-reported medical condition (no illness, having illness but  
8 4 need no treatment, having illness but discontinued treatment, and receiving some  
9 5 treatment). We dichotomized it; that is, no illness or not. We assessed self-rated health  
10 6 using four categories: *excellent*, *good*, *fair*, and *poor*.  
11 7  
12 8

### 13 9 **Statistical analysis**

14 10 After calculating the descriptive statistics, we conducted four regression analyses. First,  
15 11 we adopted a classical linear regression (ordinary linear squares [OLS]) model,  
16 12 controlling covariates at baseline survey. We handled the missing value in each control  
17 13 variable as a dummy variable. Second, as one of robustness check, we predicted the  
18 14 marginal effects, adopting a generalized linear model (GLM)<sup>31</sup> with Gamma distribution,  
19 15 as well as the log link and robust variance estimator, because our dependent variable  
20 16 (the cumulative cost of LTCI services) is not normally distributed. Next, we performed  
21 17 a multiple imputation technique by chained equations under the missing at random  
22 18 assumption, which means there might be systematic differences between the missing  
23 19 and observed values. We created twenty imputed datasets. Using each dataset, we first  
24 20 estimated the OLS model with the robust variance estimator. Finally, in order to estimate  
25 21 the potential outcomes after conditioning on the covariates, we adopted the inverse  
26 22 probability weighting (IPW) model<sup>32, 33</sup> using the imputed data sets. We calculated the  
27 23 generalized propensity scores using multinomial regression analysis, employing all  
28 24 previously listed covariates. For reference, we only examined the same model among  
29 25 the deceased, who passed away during the follow-up period. The LTCI costs for the  
30 26 deceased indicates the “lifetime cost” of LTCI because they did not use LTCI services  
31 27 at the baseline. We performed analyses using STATA 15.1 (STATA Corp LP, College  
32 28 Station, Texas, USA).  
33 29  
34 30

### 35 31 **Patient and public involvement**

36 32 No patient or the public was involved in the development of research question and design  
37 33  
38 34  
39 35  
40 36  
41 37  
42 38  
43 39  
44 40  
45 41  
46 42  
47 43  
48 44  
49 45  
50 46  
51 47  
52 48  
53 49  
54 50  
55 51  
56 52  
57 53  
58 54  
59 55  
60 56



1  
2  
3  
4  
5  
6  
7  
8  
9  
10  
11  
12  
13  
14  
15  
16  
17  
18  
19  
20  
21  
22  
23  
24  
25  
26  
27  
28  
29  
30  
31  
32  
33  
34  
35  
36  
37  
38  
39  
40  
41  
42  
43  
44  
45  
46  
47  
48  
49  
50  
51  
52  
53  
54  
55  
56  
57  
58  
59  
60

1 of this study. The results of this research will be disseminated to stakeholders such as  
2 local and central health government after being published in a scientific journal.

3  
4  
5

For peer review only

## Results

**Table 1** shows the characteristics of the respondents; the mean age at the baseline was 73.4; 52.0% of the respondents were male. Out of this amount, 30.4% had used LTCI services at least once, and 28.4% passed away during the follow-up period. The average of the cumulative cost of LTCI services during the follow-up period was 13.7 thousand USD. The distribution of that was skewed right. There were significant differences in the average duration for the level of care required for social participation across the whole population during the follow-up period (**Table 2**). Non-participants in groups for hobbies, sports, and volunteering had a longer duration of certification for LTC at all care levels. For example, among participants who took part in the group for hobbies, the average duration for non-participants was 14.1 (standard deviation [SD]=25.8) months, whereas that of those who participated “once a week or more” was 10.6 (SD=21.6) months.

The classical regression model showed that in comparison to non-participants, respondents who participated in the group for hobbies once a week produced a cost containment in 3.6 (95% confidence interval [CI]: 6.0 to 1.3) thousand USD, which was lower per person for LTCI cumulative costs over the 11-year period (**Table 3**). Likewise, participating in a sports club was also significantly associated with lower LTCI costs: the category of those who took part “once a week or more” was 4.9 [95% CI: 6.9 to 2.8] thousand USD less per person. However, in the volunteer group, only less frequent participation was associated with lower costs; for individuals in the category of “a few times a year” this figure was 4.1 [95% CI: 7.1 to 1.0] thousand USD less per person. When we changed the estimation method to GLM, and when we adopted OLS after multiple imputation, the major results and trends were similar to the above, although some point estimations in GLM were higher in the categories that had a small sample size (please see **Supplementary Table S1**).

The estimations of IPW showed similar outcomes. In comparison to non-participants, going to a group for hobbies once a week or more resulted in a cost that was reduced by approximately 3.5 [95% CI: 6.2 to 0.8] thousand USD; for sports clubs, this lowered figure was approximately 6.1 [95% CI: 9.3 to 2.8] thousand USD. The significant

1  
2  
3  
4  
5  
6  
7  
8  
9  
10  
11  
12  
13  
14  
15  
16  
17  
18  
19  
20  
21  
22  
23  
24  
25  
26  
27  
28  
29  
30  
31  
32  
33  
34  
35  
36  
37  
38  
39  
40  
41  
42  
43  
44  
45  
46  
47  
48  
49  
50  
51  
52  
53  
54  
55  
56  
57  
58  
59  
60

1 relationship with less frequent participation in the volunteer group disappeared, but the  
2 direction of the association and point estimations did not largely change (the C statistics  
3 in these models are shown in **Supplementary Table S2**).

4 In addition, in comparison to non-participants, for deceased individuals during the  
5 follow-up period, joining a group for hobbies (once a week+) or sports (once a week+)  
6 led to a reduced cost of approximately 3.9 to 5.7 thousand USD, and 9.4 to 11.4 thousand  
7 USD, respectively (please see **Supplementary Table S3**). These outcomes are  
8 preliminary because there were very few analyzed subjects (especially the sports and  
9 volunteer groups).

10

## Discussions

According to the 11-year prospective cohort study of healthy Japanese older adults, compared to non-participants, respondents who took part in hobby groups or sports activities once a week incurred lower costs for long-term care insurance (LTCI) services (approximately 3.5 and 6.1 thousand USD, respectively, per person), even after demographic variables and health status at baseline were controlled.

These findings are consistent with those of previous research in which several longitudinal studies have shown that older adults who participate in social activities have lower risks of disability,<sup>34</sup> functional declines,<sup>35,36</sup> and mobility declines.<sup>37,38</sup> Moreover, it has been suggested that participation in hobby groups, sports clubs, and volunteer groups might contribute to reducing the incidence of physical disability risks.<sup>15,17,26-28</sup> In an intervention study examining the effect of community salons in Japan, it was reported that the incidence of physical disability risks among participants fell by 51% over five years<sup>39</sup> and that cognitive disability risks declined by around 30% over seven years.<sup>40</sup> Several trajectory analyses have shown that attending leisure activities is related to “functional maintenance,”<sup>41</sup> while a low frequency of going outside the home was related to being “persistently disabled.”<sup>42</sup>

This study adds evidence to the current literature suggesting that social participation may be effective not only for preventing functional deterioration but also in terms of reducing LTC costs. Our findings also illustrate that the more the respondents took part in each type of community activity, the less time they spent in intensive nursing care. Although the mechanisms behind the relationship between collective social participation and LTCI costs are not fully understood, participating in community activities might contribute to the promotion of physical activities, the maintenance of social role and social networks, and the acquisition of important health-related information. Therefore, differences in LTCI costs may have arisen due to extensions to healthy life expectancy or reductions in the periods of functional disability, rather than restrictions on the use of the required services. Lifetime LTCI costs, which were estimated among deceased individuals, showed similar trends. This suggests that postponing the onset of functional disabilities or death did not cause the differences in costs.

1  
2  
3  
4  
5  
6  
7  
8  
9  
10  
11  
12  
13  
14  
15  
16  
17  
18  
19  
20  
21  
22  
23  
24  
25  
26  
27  
28  
29  
30  
31  
32  
33  
34  
35  
36  
37  
38  
39  
40  
41  
42  
43  
44  
45  
46  
47  
48  
49  
50  
51  
52  
53  
54  
55  
56  
57  
58  
59  
60

1 On the other hand, for volunteer activities, less frequent (rather than very frequent)  
2 participation resulted in lower LTCI costs. In Japan, it has often been mentioned that a  
3 portion of those participating in volunteer activities shoulder excessive burdens in terms  
4 of supporting those activities, and official Japanese statistics have revealed that half of  
5 older adults preferred volunteer activities that do not constrain their time.<sup>43</sup> Our results  
6 also suggest that being forced to take part in volunteer activities, which is counter to the  
7 intended meaning of volunteering, might not necessarily protect the participant's health,  
8 even though participating in and of itself has preventive effects.

9 It is clear that this study has public health implications. For example, one systematic  
10 review mentioned that most local and national public health interventions are aimed at  
11 cost saving,<sup>44</sup> and our results suggest that promoting participation in community  
12 activities might have a non-ignorable cost-containment effect. More specifically, 21.8%  
13 and 12.7% of the respondents, or about 2,240 and 1,300 people, in this municipality may  
14 have been participating in hobby or sports groups at least once a week. If those numbers  
15 were 10% higher (approximately 220 and 130 people), it may have been possible to  
16 reduce the cumulative cost of LTCI services by approximately 780 to 800, and 630 to  
17 790 thousand USD, respectively, over an 11-year period. It is important to note that each  
18 activities discussed in this paper are not special programs, and that all of them are already  
19 common in Japan. Hence, the additional expenditures to be borne by the public sector  
20 would be comparatively minor. It is also suggested that an accumulation of cost impact  
21 analyses might be meaningful in terms of public health and community work research.  
22 Furthermore, our findings might even be an underestimation because less frequent  
23 categories for each type of social participation tend to result in higher mortality rates.

24 Our study has several limitations and strengths. First, due to restricted data accessibility,  
25 we could not analyze medical care costs, which is significant because a previous study  
26 mentioned that medical care and LTC expenditures have a weak, but negative,  
27 relationship.<sup>45</sup> However, to the best of our knowledge, our study is the first to  
28 demonstrate that social participations among older adults might help lower subsequent  
29 LTCI costs. Second, we assessed social participation variables and covariates only at the  
30 baseline. More specifically, our study only analyzed healthy older adults, excluding

1 those with physically and cognitively disabilities. We also controlled for multiple health  
2 dimensions and other covariates by adopting several statistical techniques. However,  
3 since the baseline survey was based on a self-reported questionnaire, we cannot deny  
4 the possibility of reverse causation. Third, generalizability might be limited by the fact  
5 that our study was conducted in one municipality, even though the proportions of older  
6 adults and certified LTC levels between the subject area and the national average are  
7 roughly the same. Furthermore, selection bias might have occurred because the response  
8 rate in our baseline survey was not high (53.4%). However, there are important  
9 conclusions that can be drawn from an analysis of merged individual data from this  
10 questionnaire regarding social life and public receipt data as they pertain to LTC services.  
11 Fourth, there might be measurement bias regarding the actual social participation levels  
12 because the data were derived solely from responses to the self-reported questionnaire.  
13 Although our indicators have often been used in previous surveys, it is possible that the  
14 self-reported activities do not reflect actual participation levels. To assess the frequency  
15 and role of these groups, future research should examine interactions among  
16 participating members using more objective indicators.

**Acknowledgments** The authors thank public and private sector staff in this community, and other JAGES group members for their helpful suggestions.

**Author Contributions** All authors contributed to the conception and design of this study. Data collection was primarily conducted by MS, YO and KK. Analyses were performed by MS and supported by JA, NK, JS and HK. MS prepared the initial manuscript and JA, NK, JS, HK, AA, and KK significantly contributed to revising it. All authors read and approved the final manuscript.

**Funding** This study was supported in part by JSPS KAKENHI (16K13443, 18H00953), the Research and Development Grants for Longevity Science from AMED (Japan Agency for Medical Research and development). The baseline survey data from the Aichi Gerontological Evaluation Study (AGES), conducted by the Center for Well-being and Society, Nihon Fukushi University as one of their research projects. This study was supported in part by MEXT-Supported Program for the Strategic Research Foundation at Private Universities, 2009-2013 and Grant-in-Aid for Scientific Research (KAKENHI) (23243070, 18390200). The funders had no role in study design, data collection and analysis, decision to publish, or preparation of the manuscript. Any credits, analyses, interpretations, conclusions, and views expressed in this paper are those of the authors, and do not necessarily reflect those of the institutions.

**Disclaimer** The funding sources had no role in study design, data collection and analysis, decision to publish or preparation of the manuscript.

**Competing interests** None declared.

**Ethics approval** This study was performed on the basis of collaborative research agreement with municipality. Ethical permission (No. 16-29) was provided by the Ethics Board at Nihon Fukushi University.

**Provenance and peer review** Not commissioned; externally peer reviewed.

**Data sharing statement** Data is not open for public due to ethical concerns. Data are from the JAGES study whose authors may be contacted at data management committee: dataadmin@jages.net. The data set has ethical or legal restrictions because it includes human participants.

## References

1. W Greysen SR., Stijacic Cenzer I., & Boscardin WJ., (2017) Functional impairment: an unmeasured marker of medicare costs for postacute care of older adults. *J Am Geriatr Soc.* 65(9): 1996-2002.
2. National Institute of Population and Social Security Research (2017) *Population Projections for Japan: 2016-2065 (With long-range Population Projections: 2066-2115)*. ([http://www.ipss.go.jp/pp-zenkoku/j/zenkoku2017/pp29\\_ReportALL.pdf](http://www.ipss.go.jp/pp-zenkoku/j/zenkoku2017/pp29_ReportALL.pdf))
3. Ministry of Health, Labour and Welfare (2017) *Long-Term Care, Health and Welfare Services for the Elderly*. (<http://www.mhlw.go.jp/english/policy/care-welfare/care-welfare-elderly/index.html>)
4. Bukov A, Maas I, Lampert T. (2002) Social participation in very old age: cross-sectional and longitudinal findings from BASE. Berlin Aging Study. *J Gerontol B Psychol Sci Soc Sci.* 57(6): P510-P517.
5. Stuck AE., Walthert JM., & Nikolaus T., et al. (1999) Risk factors for functional status decline in community-level elderly people; a systematic literature review. *Soc Sci Med*, 48: 445-469.
6. Holt-Lunstad J. Smith TB. & Layton JB. (2010) Social relationships and mortality risk: a meta-analytic review. *PLoS Medicine.* 7(7): e1000316. doi:10.1371.



7. Cattan M. (2010) *Preventing social isolation and loneliness among older people: effectiveness of health promotion interventions*. Saarbrücken: Lambert academic publishing.
8. Dickens AP, Richards SH, & Greaves CJ, et al. (2011) Interventions targeting social isolation in older people: a systematic review. *BMC Public Health*. 11:647.
9. Douglas H., Georgiou A., Westbrook J., (2017) Social participation as an indicator of successful aging: an overview of concepts and their associations with health. *Australian Health Review*, 41: 455-462.
10. Webber M., & Fendt-Newlin M., (2017) A review of social participation interventions for people with mental health problems. *Soc Psychiatr Epidemiol*, 52: 369-380.
11. Takagi D., Kondo K., & Kawachi I., et al. (2013) Social participation and mental health; moderating effects of gender, social role and rurality. *BMC Public Health*. 13: 701
12. Tsuji T, Sasaki Y, & Matsuyama Y et al. (2017) Reducing depressive symptoms after the Great East Japan Earthquake in older survivors through group exercise participation and regular walking: a prospective observational study. *BMJ Open*, 7(3): e013706.
13. Shiba K., Kondo N., & Kondo K. et al. (2017) Retirement and mental health: does social participation mitigate the association? A fixed-effects longitudinal analysis. *BMC Public Health*. 17(1): 526
14. Hirai H., Kondo K., Ojima T., et al. (2009) Examination of risk factors for onset of certification of long-term care insurance in community-dwelling older people : AGES project 3-year follow-up study. *Jpn J Public Health*, 56(8), 501-512 (in Japanese with English abstract)
15. Kanamori, S., Kai, Y., & Kondo, K., et al. (2012) Participation in sports organizations and the prevention of functional disability in older Japanese: the AGES cohort study. *PLoSOne*, 7(11): e51061.
16. Kanamori S., Kai Y., & Aida J. et al. (2014) Social participation and the prevention of functional disability in older Japanese: the JAGES cohort study. *PLoS One*. 9(6): e99638.
17. Takeda T., Kondo K., & Hirai H., et al. (2010) Psychosocial risk factors involved in progressive dementia-associated senility among the elderly residing at home AGES Project—Three year cohort longitudinal study. *Jpn J Public Health*, 57(12): 1054-1065 (in Japanese with English abstract).
18. Saito T., Murata C., & Saito M, et al. (2018) Influence of social relationship domains and their combinations on incident dementia: a prospective cohort study. *J Epidemiol Community Health*, 72(1): 7-12.
19. Hayashi T., Kondo K., & Suzuki K., et al. (2014) Factors associated with falls in community-dwelling older people with focus on participation in sport organizations; the Japan Gerontological Evaluation Study Project. *BioMed Research International*, 537614.
20. Noda H., Iso H., Toyoshima H., et al., (2005) Walking and sports participation and mortality from coronary heart disease and stroke. *Journal of the American College of Cardiology*, 46(9): 1761-1767.
21. Saito, M., Kondo, N., & Kondo, K., et al. (2012) Gender differences on the impacts of social exclusion on mortality among older Japanese: AGES cohort study. *Soc Sci Med*, 75, 940-945.
22. Ishikawa Y., Kondo N., & Kondo K, et al. (2016) Social participation and mortality: does social position in civic groups matter? *BMC Public Health*. 16(1): 394.
23. Ashida T., Kondo N., & Kondo K (2016) Social participation and the onset of functional disability by socioeconomic status and activity type; the JAGES cohort study. *Prev Med*, 89: 121-128.
24. Tamiya T., Noguchi H., Nishi A., et al. (2011) Population ageing and wellbeing: lessons from Japan's long-term care insurance policy. *Lancet*, 378(9797): 1183-1192
25. Osaka university commerce JGSS Research Center. Summary of Surveys. ([http://jgss.daishodai.ac.jp/english/surveys/sur\\_top.html](http://jgss.daishodai.ac.jp/english/surveys/sur_top.html))
26. Ashida T., Kondo N., Kondo K. (2016) Social participation and the onset of functional disability by socioeconomic status and activity type: the JAGES cohort study. *Prev Med*, 89: 121-128.
27. Lum T.Y., & Lightfoot E. (2005) The effects of volunteering on the physical and mental health of older people. *Res Aging*, 27(1): 31-55.
28. Musick M.A., & Wilson J. (2003) Volunteering and depression: the role of psychological and social resources in different age group. *Soc Sci Med*, 56(2) 259-269.



- 1  
2  
3  
4  
5  
6  
7  
8  
9  
10  
11  
12  
13  
14  
15  
16  
17  
18  
19  
20  
21  
22  
23  
24  
25  
26  
27  
28  
29  
30  
31  
32  
33  
34  
35  
36  
37  
38  
39  
40  
41  
42  
43  
44
29. Aida J., Hanibuchi T., & Nakade M., et al. (2009) The different effects of vertical social capital and horizontal social capital on dental status: a multilevel analysis. *Soc Sci Med.* 69(4): 512-518
  30. Yazawa A., Inoue Y., & Fujiwara T., et al. (2016) Association between social participation and hypertension among older people in Japan: the JAGES Study. *Hypertens Res.* 39(11):818-824.
  31. McCullagh P., & Nelder J.A., (1989) *Generalized Linear Models, second ed.* CRC Press.
  32. Hoshino T., & Okada K., (2006) Estimation of causal effect using propensity score methods in clinical medicine, epidemiology, pharmacoepidemiology and public health; a review. *J. Natl. Inst. Public Health*, 55(3): 230-243 (in Japanese with English abstract).
  33. Brookhart MA., Schneeweiss S., & Rothman KJ., et al. (2006) Variable selection for propensity score models. *Am J Epidemiol.* 163(12):1149-1156
  34. Mendes de Leon C.F., Glass T.A., Berkman L.F. (2003) Social engagement and disability in a community population of older adults: the New Haven EPESE. *Am J Epidemiol.* 157(7): 633-642.
  35. James B.D., Boyle P.A., Buchman A.S., et al. (2011) Relation of late-life social activity with incident disability among community-dwelling older adults. *J Gerontol A Biol Sci Med Sci*, 66A(4):467-473
  36. Thomas PA. (2011) Trajectories of social engagement and limitations in late life. *J Health Soc Behav*, 52(4): 430-443.
  37. Avlund K., Vass M., & Hendriksen C. (2003) Onset of mobility disability among community-dwelling old men and women: the role of tiredness in daily activities. *Age Ageing* 32(6): 579-584
  38. Buchman A.S., Boyle P.A., & Wilson R.S., et al. (2009) Association between late-life social activity and motor decline in older adults. *Arch Intern Med*, 169(12): 1139-1146.
  39. Hikichi H., Kondo N., & Kondo K., et al. (2015) Effect of community intervention program promoting social interactions on functional disability prevention for older adults; propensity score matching and instrumental variable analyses, JAGES Taketoyo study. *J Epidemiol Community Health*, 69(9):905-910.
  40. Hikichi H., Kondo K., & Takeda T, et al. (2017) Social interaction and cognitive decline; results of a 7-year community intervention. *Alzheimers Dement (N Y)*, 3: 23-32
  41. Yu HW., Chiang TL., & Chen DR., et al. (2016) Trajectories of Leisure Activity and Disability in Older Adults Over 11 Years in Taiwan. *J Appl Gerontol.* 1: 733464816650800
  42. Saito J., Kondo N., Saito M., et al. (2018) Exploring 2.5-year trajectories of functional decline in older adults by applying a growth mixture model and the frequency of outings as a predictor: 2010–2013 JAGES longitudinal study. *J Epidemiol*, (in press).
  43. Cabinet Office (2011) *Results of survey on attitude toward the senior citizens' economic life* (in Japanese) (<http://www8.cao.go.jp/kourei/ishiki/h23/sougou/zentai/index.html>)
  44. Masters R., Anwar E., & Collins B., et al. (2017) Return on investment of public health interventions: a systematic review. *J Epidemiol Community Health*, 71: 827-834
  45. Suzuki W., Iwamoto Y., & Yuda M., et al. (2012) The distribution patterns of medical care and long-term care expenditures. *Jpn. J. Health Econ. Policy. (Iryo-Keizai Kenkyu)*, 24(2): 86-107 (in Japanese with English abstract).

## 45 SUPPORTING INFORMATION

46 Additional Supporting Information may be found in the online version of this article:

47 **Figure 1.** Flow chart of respondent selection.

48 **Table S1.** Differences of cumulative cost in LTCI services by OLS with MI, and GLM

49 **Table S2.** C statistics by multinominal regression model

50 **Table S3.** Differences of lifetime cost in LTCI services by social participation among deceased person

51  
52  
53  
54  
55  
56  
57  
58  
59  
60

**Tab.1 Characteristics of respondents**

|                                                  | Total      | Cumulative cost of<br>LTCI services in<br>11 years (1000USD) <sup>b)</sup> |          |
|--------------------------------------------------|------------|----------------------------------------------------------------------------|----------|
|                                                  | %          | Mean ± SD                                                                  | <i>p</i> |
| <b>Sex <sup>a)</sup></b>                         |            |                                                                            |          |
| Male                                             | 52.0       | 7.7 ± 24.8                                                                 |          |
| Female                                           | 48.0       | 18.7 ± 44.8                                                                | <.001    |
| <b>Age <sup>a)</sup></b>                         |            |                                                                            |          |
| (Mean±SD)                                        | (73.4±6.2) |                                                                            |          |
| 65-74                                            | 61.3       | 6.3 ± 25.2                                                                 |          |
| 75-84                                            | 33.3       | 23.0 ± 47.2                                                                |          |
| 85+                                              | 5.4        | 39.1 ± 56.4                                                                | <.001    |
| <b>Disease and/or impairment <sup>a,b)</sup></b> |            |                                                                            |          |
| None                                             | 27.2       | 10.9 ± 35.5                                                                |          |
| Presence <sup>b)</sup>                           | 64.6       | 14.3 ± 37.8                                                                |          |
| Missing                                          | 8.3        | 17.7 ± 39.7                                                                | =.001    |
| <b>Years of education <sup>a)</sup></b>          |            |                                                                            |          |
| <6                                               | 2.7        | 30.7 ± 57.6                                                                |          |
| 6-9                                              | 41.9       | 12.4 ± 34.9                                                                |          |
| 10-12                                            | 24.8       | 13.1 ± 37.2                                                                |          |
| 13+                                              | 32.2       | 11.1 ± 33.3                                                                |          |
| Missing                                          | 10.7       | 23.2 ± 48.8                                                                | <.001    |
| <b>Equivalent income (1000USD) <sup>a)</sup></b> |            |                                                                            |          |
| <20.0                                            | 36.0       | 12.2 ± 36.5                                                                |          |
| 20.0-39.9                                        | 27.3       | 9.5 ± 30.5                                                                 |          |
| 40.0+                                            | 6.8        | 12.0 ± 35.5                                                                |          |
| Missing                                          | 29.9       | 19.6 ± 43.6                                                                | <.001    |
| <b>Marital status <sup>a)</sup></b>              |            |                                                                            |          |
| Married                                          | 69.2       | 9.2 ± 29.7                                                                 |          |
| Widowed                                          | 21.4       | 24.8 ± 50.2                                                                |          |
| Divorced                                         | 1.7        | 11.0 ± 27.9                                                                |          |
| Never married                                    | 2.0        | 27.4 ± 60.1                                                                |          |
| Missing                                          | 5.7        | 22.7 ± 45.9                                                                | <.001    |
| <b>Living situation <sup>a)</sup></b>            |            |                                                                            |          |
| Living alone                                     | 10.7       | 23.8 ± 50.9                                                                |          |
| With spouse only                                 | 36.5       | 9.6 ± 30.1                                                                 |          |
| With child                                       | 22.7       | 12.9 ± 35.9                                                                |          |
| With others                                      | 25.6       | 14.6 ± 39.7                                                                |          |
| Missing                                          | 4.6        | 21.3 ± 41.6                                                                | <.001    |
| <b>Self rated health <sup>a)</sup></b>           |            |                                                                            |          |
| Excellent                                        | 6.0        | 7.9 ± 30.5                                                                 |          |
| good                                             | 61.7       | 11.5 ± 34.5                                                                |          |
| Fair                                             | 22.5       | 18.2 ± 43.0                                                                |          |
| Poor                                             | 5.1        | 21.7 ± 45.6                                                                |          |
| Missing                                          | 4.7        | 18.9 ± 39.9                                                                | <.001    |
| TOTAL                                            | 100.0      | 13.7 ± 37.4                                                                |          |

a) These variables are based on baseline questionnaire survey.

b) A breakdown of proportion was as follows: one=32.1%, two=15.2%, three=4.2%, four and over=1.9%, unknown=11.2% These variables are based on baseline questionnaire survey.

**Tab.2 Average duration of care giving at follow-up period by social participation <sup>a)</sup>**

|                               | n    | ALL <sup>a)</sup><br>Mean (SD) | Care Lv1+<br>Mean (SD) | Care Lv2+<br>Mean (SD) | Care Lv3+<br>Mean (SD) | Care Lv4+<br>Mean (SD) | Care Lv5<br>Mean (SD) |
|-------------------------------|------|--------------------------------|------------------------|------------------------|------------------------|------------------------|-----------------------|
| <b>Hobby activities group</b> |      |                                |                        |                        |                        |                        |                       |
| Never                         | 2833 | 14.1 (25.8)                    | 9.8 (21.4)             | 7.1 (17.6)             | 4.0 (12.5)             | 2.2 (8.5)              | 0.8 (4.6)             |
| A few times a year            | 259  | 9.0 (19.4)                     | 5.6 (15.7)             | 3.5 (9.9)              | 1.8 (6.4)              | 1.2 (5.3)              | 0.6 (4.1)             |
| Once or twice a month         | 524  | 10.7 (21.8)                    | 6.1 (16.6)             | 4.6 (14.4)             | 2.7 (10.2)             | 1.6 (7.5)              | 0.6 (3.7)             |
| Once a week +                 | 972  | 10.6 (21.8)                    | 6.2 (16.6)             | 4.1 (13.2)             | 2.2 (9.3)              | 1.0 (6.0)              | 0.4 (3.0)             |
|                               |      | <i>p</i> <.001                 | <i>p</i> <.001         | <i>p</i> <.001         | <i>p</i> <.001         | <i>p</i> =.019         | <i>p</i> =.026        |
| <b>Sports group or club</b>   |      |                                |                        |                        |                        |                        |                       |
| Never                         | 3716 | 13.7 (25.1)                    | 9.3 (20.7)             | 6.6 (17.0)             | 3.8 (12.1)             | 2.1 (8.4)              | 0.8 (4.6)             |
| A few times a year            | 91   | 7.5 (19.6)                     | 5.6 (18.4)             | 4.8 (16.5)             | 2.8 (12.0)             | 1.2 (5.5)              | 0.8 (5.0)             |
| Once or twice a month         | 125  | 6.0 (17.3)                     | 3.3 (13.4)             | 2.7 (12.5)             | 1.4 (6.9)              | 0.5 (2.6)              | 0.2 (1.4)             |
| Once a week +                 | 572  | 7.2 (18.1)                     | 3.8 (12.8)             | 2.4 (9.8)              | 1.0 (5.4)              | 0.5 (3.4)              | 0.1 (1.0)             |
|                               |      | <i>p</i> <.001                 | <i>p</i> <.001         | <i>p</i> <.001         | <i>p</i> <.001         | <i>p</i> <.001         | <i>p</i> =.005        |
| <b>Volunteer group</b>        |      |                                |                        |                        |                        |                        |                       |
| Never                         | 3899 | 12.9 (24.4)                    | 8.6 (20.0)             | 6.1 (16.4)             | 3.5 (11.6)             | 1.9 (7.9)              | 0.7 (4.3)             |
| A few times a year            | 194  | 7.1 (17.3)                     | 3.9 (12.8)             | 2.9 (11.1)             | 1.6 (8.3)              | 1.1 (7.7)              | 0.7 (5.6)             |
| Once or twice a month         | 193  | 9.9 (21.6)                     | 6.1 (17.0)             | 4.3 (13.3)             | 2.0 (8.9)              | 1.1 (7.2)              | 0.4 (2.7)             |
| Once a week +                 | 122  | 6.4 (17.5)                     | 3.9 (12.4)             | 3.1 (10.9)             | 1.6 (6.9)              | 0.8 (3.2)              | 0.2 (1.5)             |
|                               |      | <i>p</i> <.001                 | <i>p</i> <.001         | <i>p</i> <.001         | <i>p</i> <.001         | <i>p</i> =.019         | <i>p</i> =.165        |

Unit: month SD: Standard deviation

a) This is including certification for long-term care level from support level 1 to care level 5.

**Tab.3 Differences of cumulative cost in LTCI services in a 11-years follow-up period by social participation**

|                               | n    | Mean | OLS <sup>a,b)</sup><br>Coef.<br>(95%CI) | IPW with<br>MI <sup>c,d)</sup><br>Coef.<br>(95%CI) | Mortality |
|-------------------------------|------|------|-----------------------------------------|----------------------------------------------------|-----------|
| <b>Hobby activities group</b> |      |      |                                         |                                                    |           |
| Never                         | 2833 | 14.6 | <i>ref.</i>                             | <i>ref.</i>                                        | 30.8      |
| A few times a year            | 259  | 6.6  | - 3.2†<br>(-6.7 to 0.2)                 | - 3.5<br>(-8.1 to 1.2)                             | 28.0      |
| Once or twice a month         | 524  | 10.2 | - 2.8†<br>(-5.8 to 0.7)                 | - 2.2<br>(-5.6 to 1.2)                             | 21.7      |
| Once a week +                 | 972  | 9.4  | - 3.6**<br>(-6.0 to -1.3)               | - 3.5*<br>(-6.2 to -0.8)                           | 19.5      |
| <b>Sports group or club</b>   |      |      |                                         |                                                    |           |
| Never                         | 3716 | 13.9 | <i>ref.</i>                             | <i>ref.</i>                                        | 29.1      |
| A few times a year            | 91   | 9.3  | 2.5<br>(-4.9 to 9.9)                    | 1.8<br>(-5.8 to 9.4)                               | 18.7      |
| Once or twice a month         | 125  | 4.8  | - 3.3<br>(-7.6 to 9.4)                  | - 4.2<br>(-10.7 to 2.3)                            | 16.1      |
| Once a week +                 | 572  | 5.2  | - 4.9***<br>(-6.9 to -2.8)              | - 6.1***<br>(-9.3 to -2.8)                         | 18.6      |
| <b>Volunteer group</b>        |      |      |                                         |                                                    |           |
| Never                         | 3899 | 12.7 | <i>ref.</i>                             | <i>ref.</i>                                        | 28.4      |
| A few times a year            | 194  | 4.8  | - 4.1**<br>(-7.1 to -1.0)               | - 3.9<br>(-9.1 to 1.3)                             | 20.7      |
| Once or twice a month         | 193  | 10.0 | 1.9<br>(-2.9 to 6.7)                    | 1.5<br>(-3.8 to 6.7)                               | 12.7      |
| Once a week +                 | 122  | 5.9  | - 0.7<br>(-4.5 to 3.1)                  | - 1.4<br>(-7.9 to 5.1)                             | 11.5      |

\*\*\* p<.001 \*\* p<.01 \* p<.05 † p<.10 Unit: 1000USD

OLS: Ordinal least squares, IPW: Inverse probability weighting, MI: Multiple imputation, CI: Confidential interval

a) Missing values in control variables were included as a dummy variable.

b) The result was controlled by sex, age, disease and/or impairment, years of education, equivalent income, marital status, living situation, self rated health at baseline.

c) Multiple imputation by chained equations was performed using sex, age, disease and/or impairment, years of education, equivalent income, marital status, living situation, self rated health at baseline (m=20).

d) The generalized propensity scores were calculated using multinomial regression analysis using all previously listed potential confounders: sex, age, disease and/or impairment, years of education, equivalent income, marital status, living situation, self rated health.



Figure 1: Flow chart of respondent selection.

242x261mm (300 x 300 DPI)

**Table S1. Differences of cumulative cost in LTCI services by OLS with MI, and GLM**

|                               | n    | GLM <sup>a,b)</sup>         | OLS with MI <sup>b,c)</sup> |
|-------------------------------|------|-----------------------------|-----------------------------|
|                               |      | Marginal effect<br>(95%CI)  | Coef.<br>(95%CI)            |
| <b>Hobby activities group</b> |      |                             |                             |
| Never                         | 2833 |                             | <i>ref.</i>                 |
| A few times a year            | 259  | - 1.9<br>(-11.0 to 7.2)     | - 3.1†<br>(-6.6 to 0.3)     |
| Once or twice a month         | 524  | - 3.3<br>(-8.7 to 2.2)      | - 2.9†<br>(-5.8 to 0.1)     |
| Once a week +                 | 972  | - 3.5†<br>(-7.3 to 0.3)     | - 3.7*<br>(-6.0 to -1.3)    |
| <b>Sports group or club</b>   |      |                             |                             |
| Never                         | 3716 |                             | <i>ref.</i>                 |
| A few times a year            | 91   | 10.9<br>(-14.3 to 36.1)     | 2.7<br>(-4.6 to 10.0)       |
| Once or twice a month         | 125  | - 5.0<br>(-17.8 to 7.9)     | - 3.5<br>(-7.8 to 0.7)      |
| Once a week +                 | 572  | - 7.0**<br>(-11.2 to -2.9)  | - 4.9***<br>(-6.9 to -2.9)  |
| <b>Volunteer group</b>        |      |                             |                             |
| Never                         | 3899 |                             | <i>ref.</i>                 |
| A few times a year            | 194  | - 9.4***<br>(-14.1 to -4.6) | - 4.3**<br>(-7.3 to -1.2)   |
| Once or twice a month         | 193  | 2.3<br>(-8.9 to 13.6)       | 1.9<br>(-2.9 to 6.8)        |
| Once a week +                 | 122  | - 2.8<br>(-11.1 to 5.6)     | - 0.5<br>(-4.4 to 3.3)      |

\*\*\* p<.001 \*\* p<.01 \* p<.05 † p<.10 Unit: 1000 USD

GLM: Generalized linear model, OLS: Ordinal least squares, MI: Multiple imputation, CI: Confidential interval

a) Missing values in control variables were included as a dummy variable.

b) Each model was controlled by sex, age, disease and/or impairment, years of education, equivalent income, marital status, living situation, self rated health at baseline.

c) Multiple imputation by chained equations was performed using sex, age, disease and/or impairment, years of education, equivalent income, marital status, living situation, self rated health at baseline (m=20).

**Table S2. C statistics by multinomial regression model**

|                                | Hobby activi-<br>ties group | Sports group<br>or club | Volunteer<br>group |
|--------------------------------|-----------------------------|-------------------------|--------------------|
| A few times a year vs Never    | 0.664                       | 0.757                   | 0.637              |
| Once or twice a month vs Never | 0.665                       | 0.695                   | 0.681              |
| Once a week + vs Never         | 0.662                       | 0.645                   | 0.713              |

C statistics by multinomial regression model in order to calculate generalized propensity scores were not high: hobby activities group=.662 to .665, sports group or club=.645 to .757, volunteer group=.637 to 713. However, it is not necessarily to mean undesirable model, because the goal of a propensity score model is to efficiently control confounding, not to predict treatment or exposure.<sup>28</sup>

**Table S3. Differences of lifetime cost in LTCI services by social participation among deceased person**

|                               | n    | Mean | OLS <sup>a,b)</sup>         | GLM <sup>a,b)</sup>           | After Multiple Imputation <sup>c)</sup> |                                       |
|-------------------------------|------|------|-----------------------------|-------------------------------|-----------------------------------------|---------------------------------------|
|                               |      |      | Coef.<br>(95%CI)            | Marginal effect<br>(95%CI)    | OLS <sup>b)</sup><br>Coef.<br>(95%CI)   | IPW <sup>d)</sup><br>Coef.<br>(95%CI) |
| <b>Hobby activities group</b> |      |      |                             |                               |                                         |                                       |
| Never                         | 861  | 19.2 | <i>ref.</i>                 |                               | <i>ref.</i>                             | <i>ref.</i>                           |
| A few times a year            | 72   | 9.7  | - 6.0*<br>(-11.9 to - 0.1)  | - 5.6<br>(-14.9 to 3.8)       | - 5.6†<br>(-11.6 to 0.3)                | - 4.7<br>(-13.7 to 4.4)               |
| Once or twice a month         | 113  | 15.8 | - 2.0<br>(-9.1 to 5.1)      | - 0.9<br>(-9.3 to 7.6)        | - 2.1<br>(-9.2 to 4.9)                  | - 2.4<br>(-9.8 to 4.9)                |
| Once a week +                 | 188  | 12.2 | - 5.3*<br>(-10.1 to -0.4)   | - 3.9<br>(-7.3 to 0.3)        | - 5.4*<br>(-10.2 to -0.5)               | - 5.7†<br>(-11.6 to 0.3)              |
| <b>Sports group or club</b>   |      |      |                             |                               |                                         |                                       |
| Never                         | 1066 | 19.1 | <i>ref.</i>                 |                               | <i>ref.</i>                             | <i>ref.</i>                           |
| A few times a year            | 17   | 4.3  | - 8.9***<br>(-13.7 to -4.1) | - 17.8***<br>(-22.8 to -12.8) | - 8.6**<br>(-14.1 to -3.0)              | - 9.4<br>(-27.3 to 8.4)               |
| Once or twice a month         | 20   | 4.0  | - 8.6**<br>(-14.8 to -2.4)  | - 18.5***<br>(-24.0 to -13.0) | - 9.1**<br>(-15.3 to -2.8)              | - 10.1<br>(-26.6 to 6.4)              |
| Once a week +                 | 105  | 5.4  | - 9.7***<br>(-13.8 to -5.7) | - 11.4**<br>(-17.8 to -4.9)   | - 9.4***<br>(-13.4 to -5.4)             | - 11.1**<br>(-18.6 to -3.5)           |
| <b>Volunteer group</b>        |      |      |                             |                               |                                         |                                       |
| Never                         | 1091 | 16.9 | <i>ref.</i>                 |                               | <i>ref.</i>                             | <i>ref.</i>                           |
| A few times a year            | 40   | 11.2 | - 1.8<br>(-12.4 to 8.8)     | - 5.9<br>(-18.8 to 7.0)       | - 1.7<br>(-12.6 to 9.2)                 | - 2.0<br>(-13.7 to 9.8)               |
| Once or twice a month         | 24   | 20.6 | 6.2<br>(-14.9 to 27.2)      | 10.2<br>(-22.5 to 42.9)       | 7.1<br>(-13.9 to 28.0)                  | 7.6<br>(-7.4 to 22.7)                 |
| Once a week +                 | 14   | 9.3  | - 4.6<br>(-16.8 to 7.7)     | - 12.5**<br>(-20.4 to -4.7)   | - 5.1<br>(-18.1 to 7.8)                 | - 3.4<br>(-23.0 to 16.2)              |

\*\*\* p<.001 \*\* p<.01 \* p<.05 † p<.10 Unit: 1000USD

OLS: Ordinal least squares, GLM: Generalized linear model, IPW: Inverse probability weighting, CI: Confidential interval

a) Missing values in control variables were included as a dummy variable.

b) Each model was controlled by sex, age, disease and/or impairment, years of education, equivalent income, marital status, living situation, self rated health at baseline.

c) Multiple imputation by chained equations was performed using sex, age, disease and/or impairment, years of education, equivalent income, marital status, living situation, self rated health at baseline (m=20).

d) The generalized propensity scores were calculated using multinomial regression analysis using all previously listed potential confounders: sex, age, disease and/or impairment, years of education, equivalent income, marital status, living situation, self rated health. C statistics were as follows: hobby activities group=.640 to .665, sports group or club=.645 to 757, volunteer group=.637 to 713.



# Reporting checklist for cohort study.

Based on the STROBE cohort guidelines.

## Instructions to authors

Complete this checklist by entering the page numbers from your manuscript where readers will find each of the items listed below.

Your article may not currently address all the items on the checklist. Please modify your text to include the missing information. If you are certain that an item does not apply, please write "n/a" and provide a short explanation.

Upload your completed checklist as an extra file when you submit to a journal.

In your methods section, say that you used the STROBE cohort reporting guidelines, and cite them as:

von Elm E, Altman DG, Egger M, Pocock SJ, Gøtzsche PC, Vandenbroucke JP. The Strengthening the Reporting of Observational Studies in Epidemiology (STROBE) Statement: guidelines for reporting observational studies.

|                        |     | Reporting Item                                                                                                                  | Page Number |
|------------------------|-----|---------------------------------------------------------------------------------------------------------------------------------|-------------|
| Title                  | #1a | Indicate the study's design with a commonly used term in the title or the abstract                                              | 1           |
| Abstract               | #1b | Provide in the abstract an informative and balanced summary of what was done and what was found                                 | 2           |
| Background / rationale | #2  | Explain the scientific background and rationale for the investigation being reported                                            | 4           |
| Objectives             | #3  | State specific objectives, including any prespecified hypotheses                                                                | 5           |
| Study design           | #4  | Present key elements of study design early in the paper                                                                         | 6           |
| Setting                | #5  | Describe the setting, locations, and relevant dates, including periods of recruitment, exposure, follow-up, and data collection | 6           |
| Eligibility criteria   | #6a | Give the eligibility criteria, and the sources and methods of selection of participants. Describe methods of follow-up.         | 6           |

|    |                  |      |                                                                   |     |
|----|------------------|------|-------------------------------------------------------------------|-----|
| 1  |                  | #6b  | For matched studies, give matching criteria and number of         | n/a |
| 2  |                  |      | exposed and unexposed                                             |     |
| 3  |                  |      |                                                                   |     |
| 4  | Variables        | #7   | Clearly define all outcomes, exposures, predictors, potential     | 6-8 |
| 5  |                  |      | confounders, and effect modifiers. Give diagnostic criteria, if   |     |
| 6  |                  |      | applicable                                                        |     |
| 7  |                  |      |                                                                   |     |
| 8  |                  |      |                                                                   |     |
| 9  |                  |      |                                                                   |     |
| 10 | Data sources /   | #8   | For each variable of interest give sources of data and details of | 6   |
| 11 | measurement      |      | methods of assessment (measurement). Describe                     |     |
| 12 |                  |      | comparability of assessment methods if there is more than one     |     |
| 13 |                  |      | group. Give information separately for for exposed and            |     |
| 14 |                  |      | unexposed groups if applicable.                                   |     |
| 15 |                  |      |                                                                   |     |
| 16 |                  |      |                                                                   |     |
| 17 |                  |      |                                                                   |     |
| 18 | Bias             | #9   | Describe any efforts to address potential sources of bias         | 13  |
| 19 |                  |      |                                                                   |     |
| 20 | Study size       | #10  | Explain how the study size was arrived at                         | 6   |
| 21 |                  |      |                                                                   |     |
| 22 |                  |      |                                                                   |     |
| 23 | Quantitative     | #11  | Explain how quantitative variables were handled in the            | 6-8 |
| 24 | variables        |      | analyses. If applicable, describe which groupings were chosen,    |     |
| 25 |                  |      | and why                                                           |     |
| 26 |                  |      |                                                                   |     |
| 27 |                  |      |                                                                   |     |
| 28 | Statistical      | #12a | Describe all statistical methods, including those used to control | 8   |
| 29 | methods          |      | for confounding                                                   |     |
| 30 |                  |      |                                                                   |     |
| 31 |                  |      |                                                                   |     |
| 32 |                  | #12b | Describe any methods used to examine subgroups and                | 8   |
| 33 |                  |      | interactions                                                      |     |
| 34 |                  |      |                                                                   |     |
| 35 |                  |      |                                                                   |     |
| 36 |                  | #12c | Explain how missing data were addressed                           | 8   |
| 37 |                  |      |                                                                   |     |
| 38 |                  | #12d | If applicable, explain how loss to follow-up was addressed        | 6   |
| 39 |                  |      |                                                                   |     |
| 40 |                  |      |                                                                   |     |
| 41 |                  | #12e | Describe any sensitivity analyses                                 | 8   |
| 42 |                  |      |                                                                   |     |
| 43 | Participants     | #13a | Report numbers of individuals at each stage of study—eg           | 6   |
| 44 |                  |      | numbers potentially eligible, examined for eligibility, confirmed |     |
| 45 |                  |      | eligible, included in the study, completing follow-up, and        |     |
| 46 |                  |      | analysed. Give information separately for for exposed and         |     |
| 47 |                  |      | unexposed groups if applicable.                                   |     |
| 48 |                  |      |                                                                   |     |
| 49 |                  |      |                                                                   |     |
| 50 |                  |      |                                                                   |     |
| 51 |                  | #13b | Give reasons for non-participation at each stage                  | 6   |
| 52 |                  |      |                                                                   |     |
| 53 |                  | #13c | Consider use of a flow diagram                                    | 6   |
| 54 |                  |      |                                                                   |     |
| 55 |                  |      |                                                                   |     |
| 56 | Descriptive data | #14a | Give characteristics of study participants (eg demographic,       | 10  |
| 57 |                  |      | clinical, social) and information on exposures and potential      |     |
| 58 |                  |      |                                                                   |     |
| 59 |                  |      |                                                                   |     |
| 60 |                  |      |                                                                   |     |

|                  |      |                                                                                                                                                                                                          |       |
|------------------|------|----------------------------------------------------------------------------------------------------------------------------------------------------------------------------------------------------------|-------|
|                  |      | confounders. Give information separately for exposed and unexposed groups if applicable.                                                                                                                 |       |
|                  | #14b | Indicate number of participants with missing data for each variable of interest                                                                                                                          | 6     |
|                  | #14c | Summarise follow-up time (eg, average and total amount)                                                                                                                                                  | 6     |
| Outcome data     | #15  | Report numbers of outcome events or summary measures over time. Give information separately for exposed and unexposed groups if applicable.                                                              | N/A   |
| Main results     | #16a | Give unadjusted estimates and, if applicable, confounder-adjusted estimates and their precision (eg, 95% confidence interval). Make clear which confounders were adjusted for and why they were included | 10    |
|                  | #16b | Report category boundaries when continuous variables were categorized                                                                                                                                    | N/A   |
|                  | #16c | If relevant, consider translating estimates of relative risk into absolute risk for a meaningful time period                                                                                             | N/A   |
| Other analyses   | #17  | Report other analyses done—e.g., analyses of subgroups and interactions, and sensitivity analyses                                                                                                        | 10    |
| Key results      | #18  | Summarise key results with reference to study objectives                                                                                                                                                 | 12    |
| Limitations      | #19  | Discuss limitations of the study, taking into account sources of potential bias or imprecision. Discuss both direction and magnitude of any potential bias.                                              | 13    |
| Interpretation   | #20  | Give a cautious overall interpretation considering objectives, limitations, multiplicity of analyses, results from similar studies, and other relevant evidence.                                         | 12-13 |
| Generalisability | #21  | Discuss the generalisability (external validity) of the study results                                                                                                                                    | 13    |
| Funding          | #22  | Give the source of funding and the role of the funders for the present study and, if applicable, for the original study on which the present article is based                                            | 14    |

The STROBE checklist is distributed under the terms of the Creative Commons Attribution License CC-BY. This checklist was completed on 25. May 2018 using <http://www.goodreports.org/>, a tool made by the [EQUATOR Network](#) in collaboration with [Penelope.ai](#)
