# Supplementary material for: Reduced long-term care cost by social participation among older Japanese adults: a prospective follow-up study in JAGES
Source: PubMed Central journal article supplement — BMJ Open. 2019 Mar 30;9(3):e024439. doi: 10.1136/bmjopen-2018-024439 (PMC6475166; doi:10.1136/bmjopen-2018-024439), 2019-03-30
Supplement: bmjopen-2018-024439supp001.pdf [file bmjopen-2018-024439supp001.pdf]

**Table S1. Differences of cumulative cost in LTCI services by OLS with MI, and GLM**

|                               | n    | GLM <sup>a,b)</sup>         | OLS with MI <sup>b,c)</sup> |
|-------------------------------|------|-----------------------------|-----------------------------|
|                               |      | Marginal effect<br>(95%CI)  | Coef.<br>(95%CI)            |
| <b>Hobby activities group</b> |      |                             |                             |
| Never                         | 2833 |                             | <i>ref.</i>                 |
| A few times a year            | 259  | - 1.9<br>(-11.0 to 7.2)     | - 3.1†<br>(-6.6 to 0.3)     |
| Once or twice a month         | 524  | - 3.3<br>(-8.7 to 2.2)      | - 2.9†<br>(-5.8 to 0.1)     |
| Once a week +                 | 972  | - 3.5†<br>(-7.3 to 0.3)     | - 3.7*<br>(-6.0 to -1.3)    |
| <b>Sports group or club</b>   |      |                             |                             |
| Never                         | 3716 |                             | <i>ref.</i>                 |
| A few times a year            | 91   | 10.9<br>(-14.3 to 36.1)     | 2.7<br>(-4.6 to 10.0)       |
| Once or twice a month         | 125  | - 5.0<br>(-17.8 to 7.9)     | - 3.5<br>(-7.8 to 0.7)      |
| Once a week +                 | 572  | - 7.0**<br>(-11.2 to -2.9)  | - 4.9***<br>(-6.9 to -2.9)  |
| <b>Volunteer group</b>        |      |                             |                             |
| Never                         | 3899 |                             | <i>ref.</i>                 |
| A few times a year            | 194  | - 9.4***<br>(-14.1 to -4.6) | - 4.3**<br>(-7.3 to -1.2)   |
| Once or twice a month         | 193  | 2.3<br>(-8.9 to 13.6)       | 1.9<br>(-2.9 to 6.8)        |
| Once a week +                 | 122  | - 2.8<br>(-11.1 to 5.6)     | - 0.5<br>(-4.4 to 3.3)      |

\*\*\* p<.001 \*\* p<.01 \* p<.05 † p<.10 Unit: 1000 USD

GLM: Generalized linear model, OLS: Ordinal least squares, MI: Multiple imputation, CI: Confidential interval

a) Missing values in control variables were included as a dummy variable.

b) Each model was controlled by sex, age, disease and/or impairment, years of education, equivalent income, marital status, living situation, self rated health at baseline.

c) Multiple imputation by chained equations was performed using sex, age, disease and/or impairment, years of education, equivalent income, marital status, living situation, self rated health at baseline (m=20).

**Table S2. C statistics by multinomial regression model**

|                                | Hobby activities group | Sports group or club | Volunteer group |
|--------------------------------|------------------------|----------------------|-----------------|
| A few times a year vs Never    | 0.664                  | 0.757                | 0.637           |
| Once or twice a month vs Never | 0.665                  | 0.695                | 0.681           |
| Once a week + vs Never         | 0.662                  | 0.645                | 0.713           |

C statistics by multinomial regression model in order to calculate generalized propensity scores were not high: hobby activities group=.662 to .665, sports group or club=.645 to .757, volunteer group=.637 to 713. However, it is not necessarily to mean undesirable model, because the goal of a propensity score model is to efficiently control confounding, not to predict treatment or exposure.<sup>28</sup>

**Table S3. Differences of lifetime cost in LTCI services by social participation among deceased person**

|                               | n    | Mean | OLS <sup>a,b)</sup>         |                               | After Multiple Imputation <sup>c)</sup> |                                       |
|-------------------------------|------|------|-----------------------------|-------------------------------|-----------------------------------------|---------------------------------------|
|                               |      |      | Coef.<br>(95%CI)            | Marginal effect<br>(95%CI)    | OLS <sup>b)</sup><br>Coef.<br>(95%CI)   | IPW <sup>d)</sup><br>Coef.<br>(95%CI) |
| <b>Hobby activities group</b> |      |      |                             |                               |                                         |                                       |
| Never                         | 861  | 19.2 | <i>ref.</i>                 |                               | <i>ref.</i>                             | <i>ref.</i>                           |
| A few times a year            | 72   | 9.7  | - 6.0*<br>(-11.9 to - 0.1)  | - 5.6<br>(-14.9 to 3.8)       | - 5.6†<br>(-11.6 to 0.3)                | - 4.7<br>(-13.7 to 4.4)               |
| Once or twice a month         | 113  | 15.8 | - 2.0<br>(-9.1 to 5.1)      | - 0.9<br>(-9.3 to 7.6)        | - 2.1<br>(-9.2 to 4.9)                  | - 2.4<br>(-9.8 to 4.9)                |
| Once a week +                 | 188  | 12.2 | - 5.3*<br>(-10.1 to -0.4)   | - 3.9<br>(-7.3 to 0.3)        | - 5.4*<br>(-10.2 to -0.5)               | - 5.7†<br>(-11.6 to 0.3)              |
| <b>Sports group or club</b>   |      |      |                             |                               |                                         |                                       |
| Never                         | 1066 | 19.1 | <i>ref.</i>                 |                               | <i>ref.</i>                             | <i>ref.</i>                           |
| A few times a year            | 17   | 4.3  | - 8.9***<br>(-13.7 to -4.1) | - 17.8***<br>(-22.8 to -12.8) | - 8.6**<br>(-14.1 to -3.0)              | - 9.4<br>(-27.3 to 8.4)               |
| Once or twice a month         | 20   | 4.0  | - 8.6**<br>(-14.8 to -2.4)  | - 18.5***<br>(-24.0 to -13.0) | - 9.1**<br>(-15.3 to -2.8)              | - 10.1<br>(-26.6 to 6.4)              |
| Once a week +                 | 105  | 5.4  | - 9.7***<br>(-13.8 to -5.7) | - 11.4**<br>(-17.8 to -4.9)   | - 9.4***<br>(-13.4 to -5.4)             | - 11.1**<br>(-18.6 to -3.5)           |
| <b>Volunteer group</b>        |      |      |                             |                               |                                         |                                       |
| Never                         | 1091 | 16.9 | <i>ref.</i>                 |                               | <i>ref.</i>                             | <i>ref.</i>                           |
| A few times a year            | 40   | 11.2 | - 1.8<br>(-12.4 to 8.8)     | - 5.9<br>(-18.8 to 7.0)       | - 1.7<br>(-12.6 to 9.2)                 | - 2.0<br>(-13.7 to 9.8)               |
| Once or twice a month         | 24   | 20.6 | 6.2<br>(-14.9 to 27.2)      | 10.2<br>(-22.5 to 42.9)       | 7.1<br>(-13.9 to 28.0)                  | 7.6<br>(-7.4 to 22.7)                 |
| Once a week +                 | 14   | 9.3  | - 4.6<br>(-16.8 to 7.7)     | - 12.5**<br>(-20.4 to -4.7)   | - 5.1<br>(-18.1 to 7.8)                 | - 3.4<br>(-23.0 to 16.2)              |

\*\*\* p<.001 \*\* p<.01 \* p<.05 † p<.10 Unit: 1000USD

OLS: Ordinal least squares, GLM: Generalized linear model, IPW: Inverse probability weighting, CI: Confidential interval

a) Missing values in control variables were included as a dummy variable.

b) Each model was controlled by sex, age, disease and/or impairment, years of education, equivalent income, marital status, living situation, self rated health at baseline.

c) Multiple imputation by chained equations was performed using sex, age, disease and/or impairment, years of education, equivalent income, marital status, living situation, self rated health at baseline (m=20).

d) The generalized propensity scores were calculated using multinomial regression analysis using all previously listed potential confounders: sex, age, disease and/or impairment, years of education, equivalent income, marital status, living situation, self rated health. C statistics were as follows: hobby activities group=.640 to .665, sports group or club=.645 to .757, volunteer group=.637 to .713.
